# Supplementary material for: Proteome Multimarker Panel for the Early Detection of Hepatocellular Carcinoma: Multicenter Derivation, Validation, and Comparison
Source: PubMed Central journal article supplement — ACS Omega. 2022 Aug 19;7(34):29934–43. doi: 10.1021/acsomega.2c02926 (PMC9434733; doi:10.1021/acsomega.2c02926), 2022-08-19
Supplement: ao2c02926_si_001.pdf [file ao2c02926_si_001.pdf]

# **Proteome Multimarker Panel for the Early Detection of Hepatocellular Carcinoma: Multicenter Derivation, validation, and Comparison**

**Ju Yeon Kim<sup>1#</sup>, Jaeyeon Kim<sup>2#</sup>, Young-Suk Lim<sup>3#</sup>**, Geum-Youn Gwak<sup>4</sup>, Injoon Yeo<sup>2</sup>, Yoseop Kim<sup>2</sup>, Jihyeon Lee<sup>5</sup>, Dongyoon Shin<sup>5</sup>, Jeong-Hoon Lee<sup>1\*</sup>, and Youngsoo Kim<sup>2\*</sup>

<sup>1</sup>Department of Internal Medicine and Liver Research Institute, Seoul National University College of Medicine, Seoul 03080, Republic of Korea

<sup>2</sup> Interdisciplinary Program of Bioengineering, Seoul National University, Seoul 08826, Republic of Korea

<sup>3</sup>Department of Gastroenterology, Liver Center, Asan Medical Center, University of Ulsan College of Medicine, Seoul 44610, Republic of Korea

<sup>4</sup>Department of Internal Medicine, Samsung Medical Center, Sungkyunkwan University School of Medicine, Seoul 06351, Republic of Korea

<sup>5</sup>Department of Biomedical Sciences, Seoul National University College of Medicine 03080, Seoul, Republic of Korea

#These authors contributed equally to this work as co-first authors.

\*These authors contributed equally to this work as co-corresponding authors.

## **AUTHOR CONTACT DETAILS:**

Ju Yeon Kim: kimjuyeon@naver.com

Jaeyeon Kim: jnkim90@snu.ac.kr

Young-Suk Lim: limys@amc.seoul.kr

Geum-Youn Gwak: gy.gwak@samsung.com

Injoon Yeo: realjune@gmail.com

Yoseop Kim: yosup0331@gmail.com

Jihyeon Lee: wisgus0261@snu.ac.kr

Dongyoon Shin: sdymath777@naver.com

### **CONTACT INFORMATION (CORRESPONDING AUTHOR):**

Youngsoo Kim, PhD

Department of Biomedical Engineering, Seoul National University, Seoul 08826, Korea

Office: +82-2-740-8073, Email: biolab@snu.ac.kr

or

Jeong-Hoon Lee, MD, PhD

Department of Internal Medicine and Liver Research Institute, Seoul National University

College of Medicine, Seoul 03080, Korea

Office: +82-2-2072-2228, FAX: +82-2-743-6701

Email: pindra@empal.com or JHLeeMD@snu.ac.kr

### **LIST OF ABBREVIATIONS:**

HCC, hepatocellular carcinoma; AFP, alpha-fetoprotein; PIVKA-II, protein induced by vitamin K absence or antagonist-II; MRM-MS, multiple reaction monitoring-mass spectrometry; CHB, chronic hepatitis B; CHC, chronic hepatitis C; AUROC; area under the receiver operating characteristics curve

## **FINANCIAL SUPPORT:**

This work was supported by the Industrial Strategic Technology Development Program (No. 20000134) and the Korea Health Industry Development Institute (No. HL19C0020 & No. HI19C1132). I.Y. was supported by BK21 FOUR, funded by the National Research Foundation of Korea. J.L. and D.S. received a scholarship from the BK21-Plus Education Program, provided by the National Research Foundation of Korea. This research was conducted in the absence of any commercial or financial relationship that could be construed as a potential conflict of interest.

## **SUPPLEMENTS**

|                              |               |
|------------------------------|---------------|
| <b>SUPPLEMENTARY METHODS</b> | <b>p. S5</b>  |
| <b>SUPPLEMENTARY FIGURES</b> | <b>p. S8</b>  |
| <b>SUPPLEMENTARY TABLES</b>  | <b>p. S13</b> |

## SUPPLEMENTARY METHODS

### Quantitative MRM-MS analysis

Prior to sample preparation, block randomization was performed to minimize the variance. A volume of 44  $\mu\text{L}$  of each sample was mixed with 176  $\mu\text{L}$  of MARS buffer A (Agilent Technologies, CA) and passed through 0.22- $\mu\text{m}$  Spin-X filters (Corning Costar, NY). The 6 most abundant proteins (albumin, immunoglobulin A, immunoglobulin G, transferrin, haptoglobin, and  $\alpha$ 1-antitrypsin) were removed from 200  $\mu\text{L}$  of each sample mixture by a Multiple Affinity Removal System Human-6 (MARS Hu-6 $\times$ 100 mm; Agilent Technologies, Santa Clara, CA) column that was loaded onto a high-performance liquid chromatography system (Shimadzu Co., Kyoto, Japan). Five milliliters of each depleted sample were then concentrated on a 3000-Da molecular weight cutoff (MWCO) filter unit (Amicon Ultra-4 3K, Millipore, MA) in a precooled centrifuge at 4°C for 6 hours.

The protein in each depleted sample was quantified by bicinchoninic acid (BCA) assay, in which 2 mg/mL of BSA standard was diluted 1:2 6 times to generate a standard curve. Each sample was diluted 1:20 and 1:40 and loaded onto a 96-well plate. Further, 200  $\mu\text{L}$  of a 1:50 mixture of copper solution and BCA solution was added and incubated at 37°C for 1 hour before scanning.

Samples were digested according to the results of the BCA assay. For a 100- $\mu\text{g}$  digestion, each sample was adjusted with HPLC water to a volume of 20  $\mu\text{L}$ . The adjusted sample was mixed with 20  $\mu\text{L}$  of 0.2% RapiGest, 20 mM DTT, and 100 mM ABC buffer and reacted in 60°C for 1 hour. Next, 10  $\mu\text{L}$  100 mM iodoacetamide (IAA) was added and stored in the dark at room temperature for 30 minutes, after which 40  $\mu\text{L}$  trypsin (Promega, sequencing-grade modified,

Madison, WI) in 50 mM ABC was added to the mixture and incubated at 37°C for 4 hours. Finally, 10 µL 10% formic acid was added and incubated at 37°C to stop the reaction. Supernatants were collected after centrifugation at 15,000 rpm and 4°C.

Prior to the mass spectrometry analysis, each sample was spiked with stable isotope-labeled standard peptide (30% to 70% purity per the manufacturer, JPT, Berlin, Germany) at a 9:1 ratio.

### **Capillary Liquid Chromatography**

MRM-MS analysis was performed on a fully automated online 1260 Capillary-flow liquid chromatography (LC) system (Agilent Technologies, Santa Clara, CA, USA). The autosampler was set to 4 °C, where the LC separation was performed at 40 °C. Sample cleanup was performed using a guard column (2.1 × 15.0 mm, 1.8 µm, 80 Å), and peptides were separated on an analytical column (0.5 × 35.0 mm, 3.5 µm, 80 Å) (both columns from Agilent Technologies, Santa Clara, CA, USA).

Ten microliters of the digested sample were injected onto a guard column at 40 µL/min for a minute in 10% solvent B. Sample flow was directed from the guard to the analytical column after the valves were switched. Then, 10% solvent B was run at a flow rate of 40 µL/min for a minute. To separate the peptides, A linear gradient of 10% to 60% solvent B over 5 mins at 40 µL/min eluted bound peptides from the analytical column. The column wash was held at 90% solvent B for 1 min at 40 µL/min and then equilibrated at 10% solvent B for 4 mins. The switching valve was returned to its original position after a minute of equilibration, while reconditioning performed simultaneously in both guard and analytical columns.

## **Mass Spectrometry**

Quantitative analysis was performed on an Agilent 6490 triple quadrupole (QqQ) mass spectrometer with an Electrospray source (Agilent Technologies, Santa Clara, CA, USA), operated in positive ion, scheduled multiple reaction monitoring (MRM) mode. Gas temperature was set to 250 °C where gas flow as 15 L/min. Sheath gas temperature was set to 350 °C where the gas flows at 12 L/min. The delta electron multiplier voltage (EMV) was set to 200 V, and the cell accelerator voltage and fragment voltage were 5 V and 380 V, respectively.

## SUPPLEMENTARY FIGURES

**Figure S1. Density plot of the 17 marker peptides in the MRM-MS panel.** Density plot of raw and log ( $\times 10^{-10}$ )-transformed data on the 17 markers. The less skewed format was used as the final transformation method.

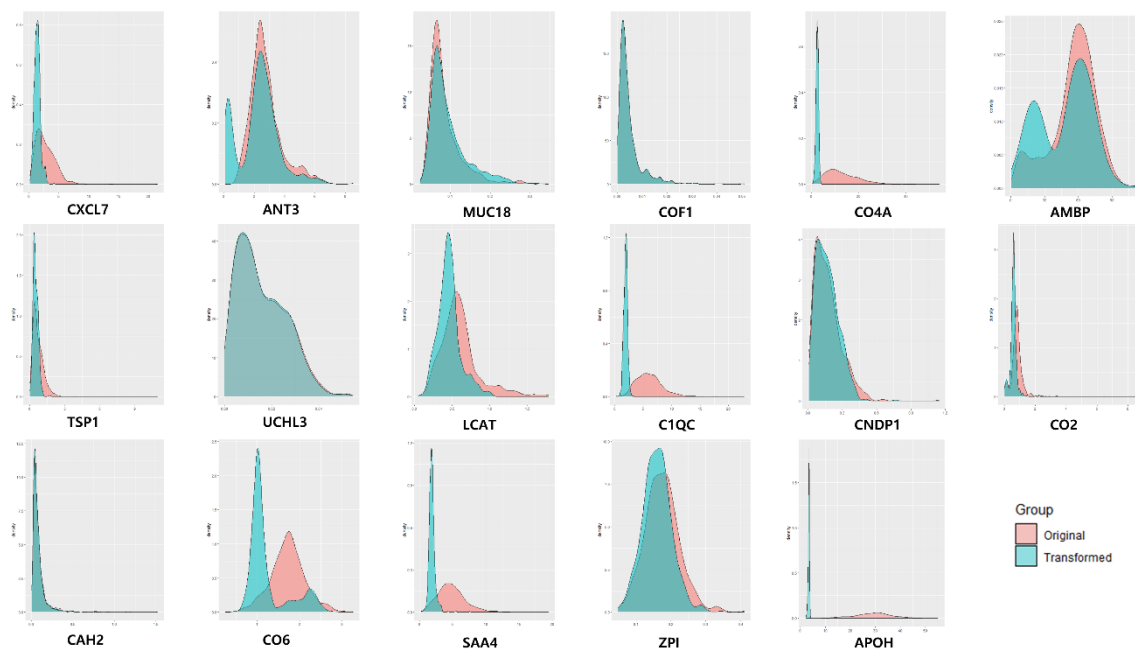



**Figure S2. Performance of AFP and the MRM-MS panel excluding general proteins. ROC curves of AFP and the MRM-MS panel with and without the combination of AFP and/or PIVKA-II excluding general proteins in the (A) training, (B) test, and (C) confirmation sets.**

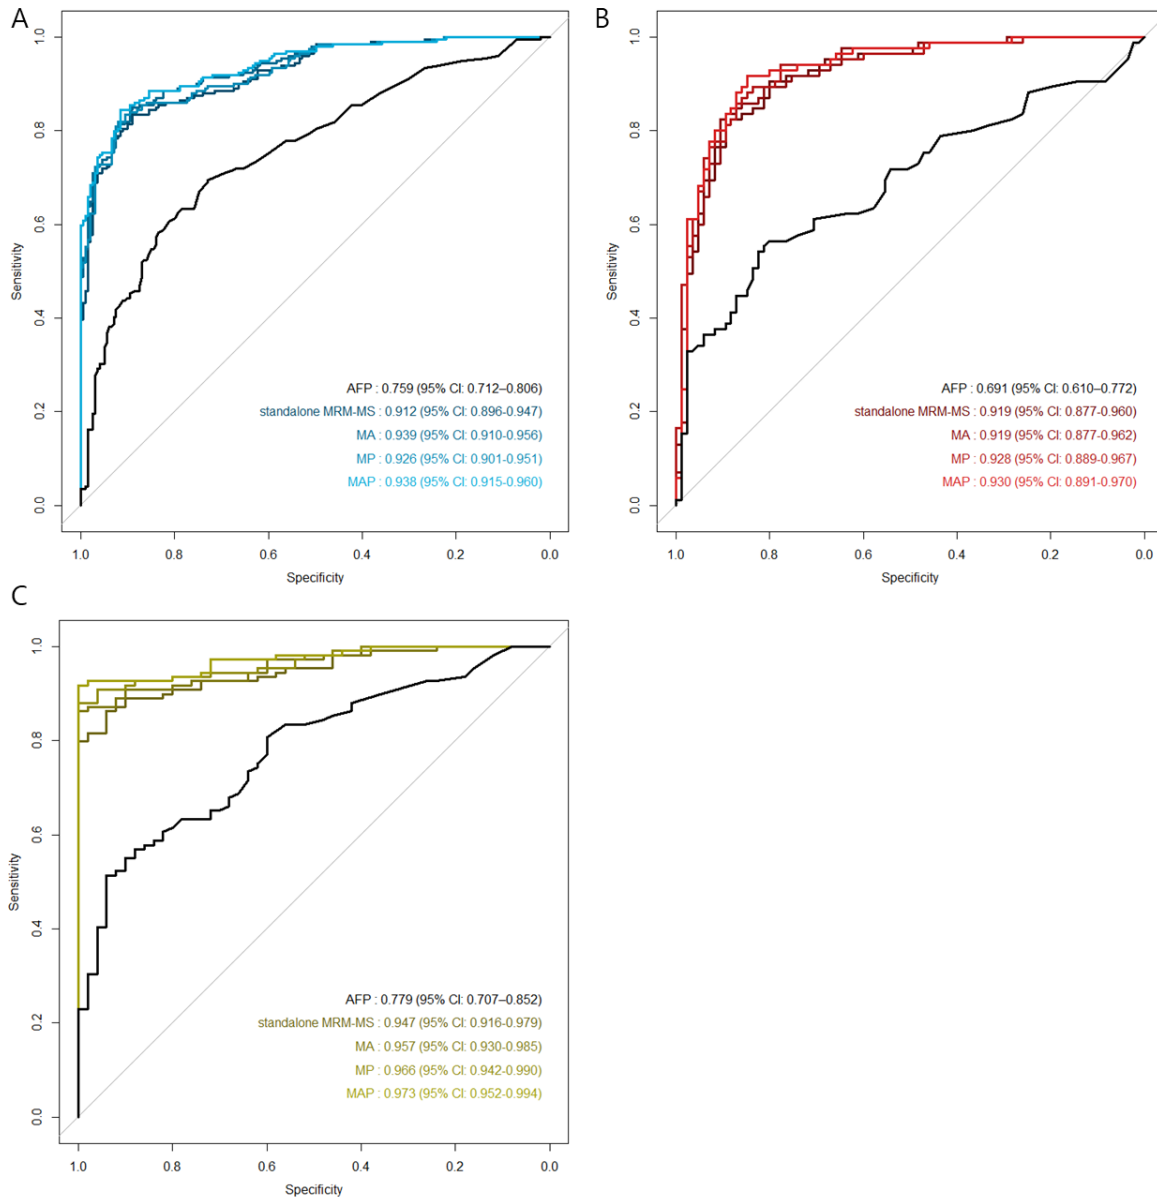

**Figure S3. Performance of AFP and the MRM-MS panel with/without combination of AFP and/or PIVKA-II in the test set. (A): ROC curve of AFP and the MRM-MS panel with/without combination of AFP and/or PIVKA-II. (B): ROC curve of AFP and the MRM-MS Panel with/without combination of AFP and/or PIVKA-II in the small(<2cm) single HCC.**

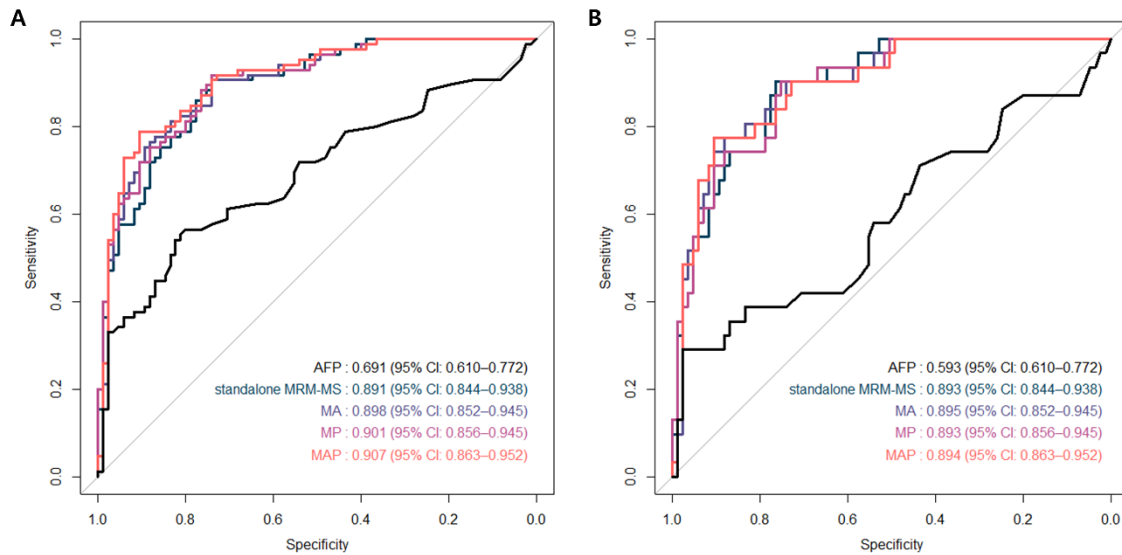

**Figure S4. Performance of GALAD score and the MRM-MS panel with and without AFP and PIVKA-II in detecting HCC. ROC curves of the GALAD score, standalone MRM-MS panel, MRM-MS + AFP (MA) panel, MRM-MS + PIVKA-II (MP) panel, and MRM-MS + AFP + PIVKA-II (MAP) panel in the GALAD cohort.**

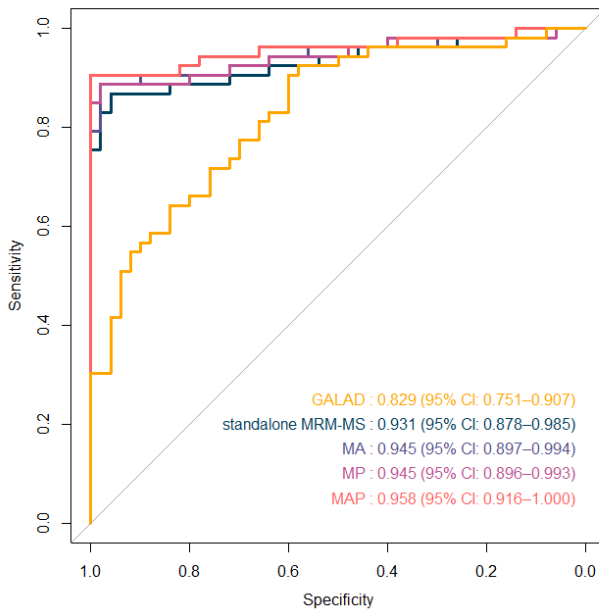

**Figure S5. Subgroup analysis of patients with cirrhosis and chronic hepatitis B. ROC curves of AFP, standalone MRM-MS panel, MRM-MS + AFP (MA) panel, MRM-MS + PIVKA-II (MP) panel, and MRM-MS + AFP + PIVKA-II (MAP) panel in the (A) training set, (B) test set, and (C) confirmation set with cirrhosis and in the (D) training set and (E) test set with chronic hepatitis B.**

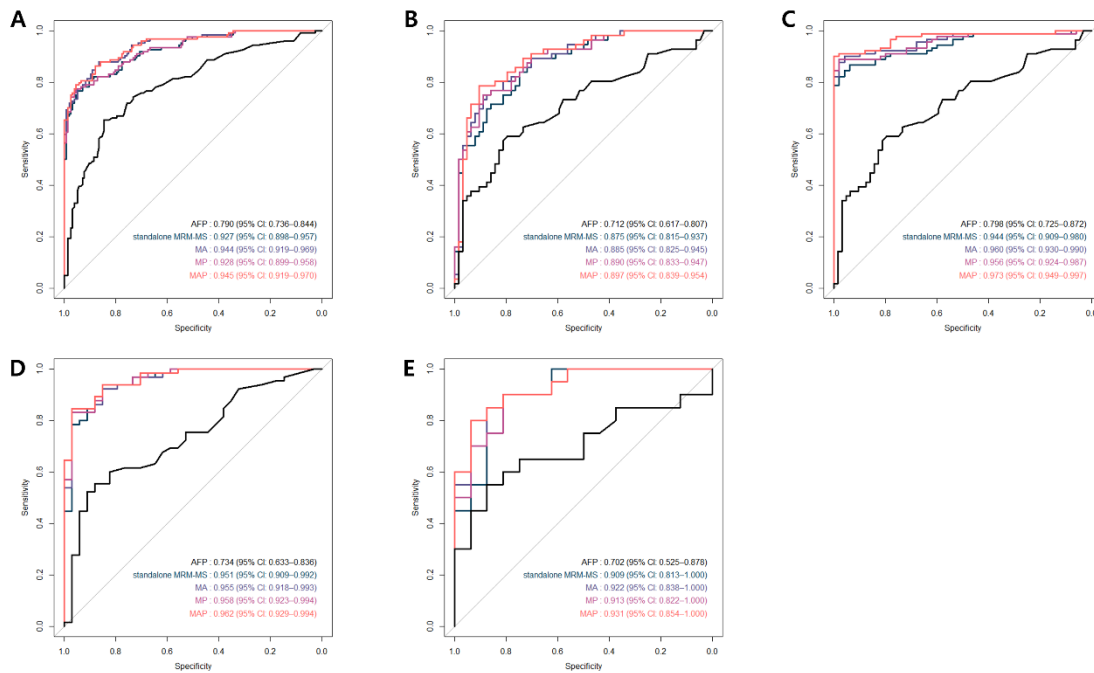

## SUPPLEMENTARY TABLES

**Table S1. Logistic regression equation (logit [P=HCC]) with selective log transformation for the 17 marker proteins**

| Protein<br>(gene name) | Peptide sequence | Transformation             | Coefficient |
|------------------------|------------------|----------------------------|-------------|
| (Intercept)            |                  |                            | -1.977      |
| PPBP                   | NIQSLEVIGK       | Log (x+10 <sup>-10</sup> ) | 1.714       |
| SERPINC1               | VWELSK           | Normal                     | -1.48       |
| MCAM                   | EVTVPVFYPTK      | Log (x+10 <sup>-10</sup> ) | -22.293     |
| CFL1                   | NIILEEGK         | Normal                     | 141.879     |
| C4A                    | DSSTWLTAFLK      | Log (x+10 <sup>-10</sup> ) | 1.175       |
| AMBIP                  | TVAACNLPIVR      | Log (x+10 <sup>-10</sup> ) | 0.034       |
| THBS1                  | GTSQNDPNWVVR     | Log (x+10 <sup>-10</sup> ) | 2.614       |
| UCLH3                  | YLENYDAIR        | Normal                     | 32.042      |
| LCAT                   | SSGLVSNAPGVQIR   | Log (x+10 <sup>-10</sup> ) | -10.386     |
| C1QC                   | TNQVNSGGVLLR     | Log (x+10 <sup>-10</sup> ) | -2.258      |
| CNDP1                  | AIHLDLEEYR       | Log (x+10 <sup>-10</sup> ) | 2.839       |
| C2                     | HAFILQDTK        | Log (x+10 <sup>-10</sup> ) | 5.261       |
| CA2                    | SADFTNFDPR       | Log (x+10 <sup>-10</sup> ) | 22.593      |
| C6                     | QLEWGLER         | Log (x+10 <sup>-10</sup> ) | 1.005       |
| SAA4                   | GPGGVWAAK        | Log (x+10 <sup>-10</sup> ) | -2.048      |
| SERPINA10              | LFDEINPETK       | Log (x+10 <sup>-10</sup> ) | 19.721      |
| APOH                   | ATVVYQGER        | Normal                     | 0.078       |

PPBP, platelet basic protein; SERPINC1, antithrombin-III; MCAM, cell surface glycoprotein; CFL1, cofilin-1; C4A, complement C4-A; AMBP, protein AMBP; THBS1, thrombospondin-1; UCHL3, ubiquitin carboxyl-terminal hydrolase isozyme L3; LCAT, phosphatidylcholine-sterol acyltransferase; C1QC, complement C1q subcomponent subunit C; CNDP1, Beta-Ala-His dipeptidase; C2, cytochrome c oxidase subunit 2; CA2, carbonic anhydrase 2; C6, complement component C6; SAA4, serum amyloid A-4 protein; SERPINA10, protein Z-dependent protease inhibitor; APOH, beta-2-glycoprotein 1.

**Table S2. Characteristics of the GALAD cohort**

|                                    | HCC<br>(n=53)          | Control<br>(n=50)    | P value |
|------------------------------------|------------------------|----------------------|---------|
| Age, years                         | 60.0<br>(52.0–66.0)    | 57.0<br>(51.0–61.0)  | 0.072   |
| Sex, N (%)                         |                        |                      | <0.001  |
| Female                             | 7 (13.2%)              | 26 (52.0%)           |         |
| Male                               | 46 (86.8%)             | 24 (48.0%)           |         |
| Body mass index, kg/m <sup>2</sup> | 25.2<br>(22.5–27.1)    | 24.4<br>(23.0–27.9)  | 0.791   |
| Platelet, x 10 <sup>3</sup> /μL    | 162.0<br>(121.0–192.0) | 74.0<br>(56.0–102.0) | <0.001  |
| Creatinine, mg/dL                  | 0.9 (0.8–1.0)          | 0.7 (0.6–0.9)        | <0.001  |
| Albumin, g/dL                      | 3.8 (3.6–4.1)          | 3.9 (3.7–4.3)        | 0.437   |
| ALT, IU/L                          | 22.0<br>(18.0–37.0)    | 23.0<br>(19.0–30.0)  | 0.685   |
| Total bilirubin, mg/dL             | 0.6 (0.4–0.8)          | 1.6 (1.0–2.3)        | <0.001  |
| Prothrombintime, INR               | 1.1 (1.0–1.1)          | 1.1 (1.1–1.3)        | <0.001  |
| Risk factors                       |                        |                      | 0.001   |
| Cirrhosis, N (%)                   | 42 (79.2%)             | 50 (100.0%)          |         |
| Noncirrhotic CHB, N (%)            | 9 (17.0%)              | 0                    |         |
| Noncirrhotic CHC, N (%)            | 2 (3.8%)               | 0                    |         |
| Others, N (%)                      | 0                      |                      |         |
| Child-Pugh class, N (%)            |                        |                      | 0.003   |
| A                                  | 50 (94.3%)             | 35 (70.0%)           |         |
| B                                  | 3 (5.7%)               | 15 (30.0%)           |         |
| Alcoholic, N (%)                   | 4 (7.5%)               | 6 (12.0%)            | 0.518   |
| Diabetes mellitus, N (%)           | 14 (26.4%)             | 5 (10.0%)            | 0.058   |
| Hypertension, N (%)                | 18 (34.0%)             | 13 (26.0%)           | 0.506   |
| AFP, ng/mL                         | 6.8 (3.0–58.1)         | 3.0 (2.3–5.6)        | <0.001  |
| PIVKA-II, mAU/mL                   | 68.0<br>(27.0–241.0)   | 17.0<br>(14.0–21.0)  | <0.001  |
| Tumor number, N (%)                |                        |                      |         |
| 1                                  | 47 (88.7%)             |                      |         |
| 2                                  | 4 (7.5%)               |                      |         |
| 3                                  | 2 (3.8%)               |                      |         |

|                   |               |
|-------------------|---------------|
| Tumor size, cm    | 2.5 (1.9–3.5) |
| AJCC stage, n (%) |               |
| IA                | 17 (32.1%)    |
| IB                | 30 (56.6%)    |
| II                | 6 (11.3%)     |

---

Data are provided as N (%) or median (interquartile range).

HCC, hepatocellular carcinoma; ALT, alanine aminotransferase; INR, international normalized ratio; CHB, chronic hepatitis B; CHC, chronic hepatitis C; AFP, alpha-fetoprotein; PIVKA-II, protein induced by vitamin K absence or antagonist-II; AJCC, American Joint Committee on Cancer.



**Table S3. Performance of AFP and the MRM-MS panel with and without AFP and PIVKA-II compared with GALAD in detecting HCC**

|                         | AUROC<br>95% CI        | P value            | Sensitivity<br>(%) | Specificity<br>(%) |
|-------------------------|------------------------|--------------------|--------------------|--------------------|
| GALAD                   | 0.718<br>(0.751–0.907) |                    | 52.8               | 92.0               |
| Standalone MRM-MS panel | 0.931<br>(0.878–0.985) | <0.001*            | 88.7               | 82.0               |
| MA panel                | 0.945<br>(0.897–0.994) | 0.064 <sup>†</sup> | 92.5               | 70.0               |
| MP panel                | 0.945<br>(0.896–0.993) | 0.013 <sup>†</sup> | 88.7               | 98.0               |
| MAP panel               | 0.958<br>(0.916–1.000) | 0.009 <sup>†</sup> | 90.6               | 98.0               |

\* AUROC of the standalone MRM-MS panel versus AUROC of GALAD score.

<sup>†</sup> AUROC of the multimarker panel with AFP and/or PIVKA-II versus AUROC of the standalone MRM-MS panel.

AUROC; area under the receiver operating characteristics curve; AFP, alpha-fetoprotein; MA, multiple reaction monitoring-mass spectrometer + AFP; MP, multiple reaction monitoring-mass spectrometer + protein induced by vitamin K absence or antagonist-II; MAP, multiple reaction monitoring-mass spectrometer + AFP + protein induced by vitamin K absence or antagonist-II.

**Table S4A. Subgroup analysis of patients with cirrhosis**

|                         | AUROC<br>95% CI        | P value            | Sensitivity<br>(%) | Specificity<br>(%) |
|-------------------------|------------------------|--------------------|--------------------|--------------------|
| <b>Training set</b>     |                        |                    |                    |                    |
| AFP                     | 0.790<br>(0.736–0.844) |                    | 20.2               | 97.5               |
| Standalone MRM-MS panel | 0.927<br>(0.898–0.957) | <0.001*            | 76.6               | 94.9               |
| MA panel                | 0.944<br>(0.919–0.969) | 0.019 <sup>†</sup> | 86.3               | 87.9               |
| MP panel                | 0.928<br>(0.899–0.958) | 0.672 <sup>†</sup> | 76.6               | 95.5               |
| MAP panel               | 0.945<br>(0.919–0.970) | 0.021 <sup>†</sup> | 77.4               | 96.2               |
| <b>Test set</b>         |                        |                    |                    |                    |
| AFP                     | 0.712<br>(0.617–0.807) |                    | 28.6               | 96.9               |
| Standalone MRM-MS panel | 0.875<br>(0.815–0.937) | 0.005*             | 76.8               | 78.1               |
| MA panel                | 0.885<br>(0.825–0.945) | 0.591 <sup>†</sup> | 87.5               | 70.3               |
| MP panel                | 0.890<br>(0.833–0.947) | 0.088 <sup>†</sup> | 80.4               | 76.6               |
| MAP panel               | 0.897<br>(0.839–0.954) | 0.303 <sup>†</sup> | 80.4               | 81.3               |
| <b>Confirmation set</b> |                        |                    |                    |                    |
| AFP                     | 0.798<br>(0.725–0.872) |                    | 36.7               | 96.0               |
| Standalone MRM-MS panel | 0.944<br>(0.909–0.980) | <0.001*            | 88.9               | 82.0               |
| MA panel                | 0.960<br>(0.930–0.990) | 0.005 <sup>†</sup> | 92.2               | 70.0               |
| MP panel                | 0.956<br>(0.924–0.987) | 0.005 <sup>†</sup> | 88.9               | 98.0               |
| MAP panel               | 0.973<br>(0.949–0.997) | 0.001 <sup>†</sup> | 90.0               | 98.0               |

\* AUROC of standalone MRM-MS panel versus AUROC of AFP.

<sup>†</sup> AUROC of multimarker panel with AFP and/or PIVKA-II versus AUROC of the standalone MRM-MS panel.

AUROC; area under the receiver operating characteristics curve; AFP, alpha-fetoprotein; MA, multiple reaction monitoring-mass spectrometer + AFP; MP, multiple reaction monitoring-mass spectrometer + protein induced by vitamin K absence or antagonist-II; MAP, multiple reaction monitoring-mass spectrometer + AFP + protein induced by vitamin K absence or antagonist-II.

**Table S4B. Subgroup analysis of patients with chronic hepatitis B**

|                         | AUROC<br>95% CI        | P value            | Sensitivity<br>(%) | Specificity<br>(%) |
|-------------------------|------------------------|--------------------|--------------------|--------------------|
| <b>Training set</b>     |                        |                    |                    |                    |
| AFP                     | 0.734<br>(0.633–0.836) |                    | 13.8               | 97.1               |
| Standalone MRM-MS panel | 0.951<br>(0.909–0.992) | <0.001*            | 86.2               | 85.3               |
| MA panel                | 0.955<br>(0.918–0.993) | 0.286 <sup>†</sup> | 92.3               | 85.3               |
| MP panel                | 0.958<br>(0.923–0.994) | 0.085 <sup>†</sup> | 87.7               | 88.2               |
| MAP panel               | 0.962<br>(0.929–0.994) | 0.111 <sup>†</sup> | 84.6               | 97.1               |
| <b>Test set</b>         |                        |                    |                    |                    |
| AFP                     | 0.702<br>(0.525–0.878) |                    | 15.0               | 100.0              |
| Standalone MRM-MS panel | 0.909<br>(0.813–1.000) | 0.048*             | 85.0               | 87.5               |
| MA panel                | 0.922<br>(0.838–1.000) | 0.388 <sup>†</sup> | 90.0               | 81.3               |
| MP panel                | 0.913<br>(0.822–1.000) | 0.843 <sup>†</sup> | 85.0               | 81.3               |
| MAP panel               | 0.931<br>(0.854–1.000) | 0.298 <sup>†</sup> | 85.0               | 81.3               |

\* AUROC of the standalone MRM-MS panel versus AUROC of AFP.

<sup>†</sup> AUROC of multimarker panel with AFP and/or PIVKA-II versus AUROC of the standalone MRM-MS panel.

AUROC; area under the receiver operating characteristics curve; AFP, alpha-fetoprotein; MA, multiple reaction monitoring-mass spectrometer + AFP; MP, multiple reaction monitoring-mass spectrometer + protein induced by vitamin K absence or antagonist-II; MAP, multiple reaction monitoring-mass spectrometer + AFP + protein induced by vitamin K absence or antagonist-II.

**Table S5. MS Method Information of 383 targets**

| Protein               | Precursor<br>Mz | Precursor<br>Charge | Product<br>Mz | Product<br>Charge | Fragment<br>Ion | Retention<br>Time |
|-----------------------|-----------------|---------------------|---------------|-------------------|-----------------|-------------------|
| A1AG1_NWGLSVYADKPETTK | 570.3           | 3                   | 704.9         | 2                 | y13             | 37.1              |
| A1AG1_SDVVYTDWK       | 556.8           | 2                   | 811.4         | 1                 | y6              | 34.5              |
| A1AT_ITPNLAEFASLYR    | 821.4           | 2                   | 1103.6        | 1                 | y9              | 52.6              |
| A1BG_LELHVDGPPRPQLR   | 575.3           | 3                   | 616.3         | 2                 | y11             | 35.4              |
| A2AP_LGNQEPGGQTALK    | 656.8           | 2                   | 771.4         | 1                 | y8              | 26.5              |
| A2AP_LCQDLGPGAFR      | 617.3           | 2                   | 604.3         | 1                 | y6              | 35.7              |
| A2AP_QEDDLANINQWVK    | 524.9           | 3                   | 674.4         | 1                 | y5              | 43.6              |
| A2AP_DFLQSLK          | 425.7           | 2                   | 588.4         | 1                 | y5              | 39.1              |
| A2AP_LFGPDLK          | 395.2           | 2                   | 529.3         | 1                 | y5              | 35.3              |
| A2GL_DLLLPQDLR        | 590.3           | 2                   | 725.4         | 1                 | y6              | 43.2              |
| A2GL_GQTLLAVAK        | 450.8           | 2                   | 715.5         | 1                 | y7              | 32.0              |
| A2MG_NEDSLVFVQTDK     | 697.8           | 2                   | 836.5         | 1                 | y7              | 36.5              |
| A2MG_TEHPFTVEEFVLPK   | 558.3           | 3                   | 861.5         | 1                 | y7              | 45.2              |
| A2MG_FEVQVTPK         | 523.8           | 2                   | 770.5         | 1                 | y7              | 37.5              |
| A2MG_QGIPFFGQVR       | 574.8           | 2                   | 850.5         | 1                 | y7              | 45.0              |
| A2MG_TGTHGLLVK        | 309.2           | 3                   | 412.8         | 2                 | y8              | 25.4              |
| A2MG_AIGYLNTGYQR      | 628.3           | 2                   | 1071.5        | 1                 | y9              | 33.9              |
| A2MG_HYDGSYSTFGER     | 473.5           | 3                   | 508.3         | 1                 | y4              | 28.6              |
| A2MG_TEVSSNHVLIYLDK   | 540.0           | 3                   | 694.4         | 2                 | y12             | 37.9              |
| AFAM_YHYLIR           | 432.7           | 2                   | 564.4         | 1                 | y4              | 29.1              |
| ALBU_DLGEENFK         | 476.2           | 2                   | 723.3         | 1                 | y6              | 29.2              |
| ALBU_LVNEVTEFAK       | 575.3           | 2                   | 937.5         | 1                 | y8              | 35.8              |
| ALBU_SLHTLFGDK        | 339.9           | 3                   | 465.8         | 2                 | y8              | 33.1              |
| ALBU_LCTVATLR         | 467.3           | 2                   | 660.4         | 1                 | y6              | 30.7              |
| ALBU_DDNPNLPR         | 470.7           | 2                   | 596.4         | 1                 | y5              | 25.4              |
| ALBU_YLYEIAR          | 464.3           | 2                   | 651.3         | 1                 | y5              | 34.2              |
| ALBU_AAFTECCQAADK     | 686.3           | 2                   | 1082.4        | 1                 | y9              | 26.2              |
| ALBU_AACLLPK          | 386.7           | 2                   | 630.4         | 1                 | y5              | 29.4              |
| ALBU_LVTDLTK          | 395.2           | 2                   | 577.3         | 1                 | y5              | 28.3              |
| ALBU_QNCELFEQLGEYK    | 553.3           | 3                   | 645.3         | 1                 | b5              | 42.9              |
| ALBU_FQNALLVR         | 480.8           | 2                   | 685.4         | 1                 | y6              | 35.7              |
| ALBU_VPQVSTPTLVEVSR   | 504.6           | 3                   | 589.3         | 1                 | y5              | 38.7              |
| ALBU_RPCFSALEVDETYVPK | 637.6           | 3                   | 719.3         | 1                 | b6              | 40.9              |
| ALBU_QTALVELVK        | 500.8           | 2                   | 587.4         | 1                 | y5              | 37.7              |
| ALS_ANVQVQLPR         | 522.3           | 2                   | 759.5         | 1                 | y6              | 39.3              |
| ALS_NLIAAVAPGAFLGLK   | 727.9           | 2                   | 802.5         | 1                 | y8              | 51.4              |

|                            |       |   |        |   |     |      |
|----------------------------|-------|---|--------|---|-----|------|
| ALS_LEYLLLSR               | 503.8 | 2 | 764.5  | 1 | y6  | 42.7 |
| ALS_LEALPNSLLAPLGR         | 732.4 | 2 | 1037.6 | 1 | y10 | 48.9 |
| AMBP_TVAACNLPIVR           | 607.3 | 2 | 1013.6 | 1 | y9  | 36.1 |
| AMBP_EYCGVPGDGDEELLR       | 854.9 | 2 | 1100.5 | 1 | y10 | 37.8 |
| ANGT_DPTFIPAPIQAK          | 649.4 | 2 | 724.4  | 1 | y7  | 40.4 |
| ANGT_VLSALQAVQGLLVAQGR     | 575.0 | 3 | 643.4  | 1 | y6  | 52.2 |
| ANGT_SLDFTELDVAAEK         | 719.4 | 2 | 975.5  | 1 | y9  | 43.4 |
| ANT3_VWELSK                | 381.2 | 2 | 662.4  | 1 | y5  | 31.7 |
| ANT3_VAEGTQVLELPFK         | 715.9 | 2 | 746.4  | 1 | y6  | 45.4 |
| ANT3_LPGIVAEGR             | 456.3 | 2 | 531.3  | 1 | y5  | 32.0 |
| APOA1_THLAPYSDELRL         | 434.6 | 3 | 619.3  | 1 | y5  | 31.0 |
| APOA2_EPCVESLVSQYFQTVTDYGK | 784.0 | 3 | 1062.5 | 2 | y18 | 53.0 |
| APOA2_SPELQAEAK            | 486.8 | 2 | 659.4  | 1 | y6  | 24.1 |
| APOA4_IDQNVEELK            | 544.3 | 2 | 974.5  | 1 | y8  | 28.7 |
| APOA4_ISASAEELR            | 488.3 | 2 | 775.4  | 1 | y7  | 27.8 |
| APOB_EVYGFNPEGK            | 570.3 | 2 | 911.4  | 1 | y8  | 32.7 |
| APOB_SVSLPSLDPASAK         | 636.3 | 2 | 885.5  | 1 | y9  | 38.7 |
| APOB_QGFFPDSVNK            | 569.8 | 2 | 659.3  | 1 | y6  | 36.1 |
| APOB_ALVDTLK               | 380.2 | 2 | 575.3  | 1 | y5  | 30.9 |
| APOB_SVGFHLPSR             | 333.9 | 3 | 407.2  | 2 | y7  | 33.6 |
| APOB_SGSSTASWIQNVDTK       | 790.9 | 2 | 1090.6 | 1 | y9  | 36.0 |
| APOB_LATALSLSNK            | 509.3 | 2 | 833.5  | 1 | y8  | 32.8 |
| APOB_AQIPILR               | 405.8 | 2 | 498.3  | 1 | y4  | 35.7 |
| APOB_TSSFALNLPTLPEVK       | 808.9 | 2 | 1010.6 | 1 | y9  | 49.5 |
| APOB_QIDDIDVR              | 487.3 | 2 | 732.4  | 1 | y6  | 30.2 |
| APOB_AASGTTGTYQEWK         | 700.3 | 2 | 911.4  | 1 | y7  | 29.2 |
| APOC2_TAAQNLYEK            | 519.3 | 2 | 865.4  | 1 | y7  | 25.2 |
| APOC2_TYLPVAVDEK           | 518.3 | 2 | 658.3  | 1 | y6  | 31.9 |
| APOC3_DALSSVQESQVAQQAR     | 573.0 | 3 | 672.4  | 1 | y6  | 32.8 |
| APOC3_GWVTDGFFSSLK         | 598.8 | 2 | 854.4  | 1 | y8  | 42.9 |
| APOC3_DYWSTVK              | 449.7 | 2 | 620.3  | 1 | y5  | 32.5 |
| APOC4_ELLETVNR             | 536.8 | 2 | 717.4  | 1 | y6  | 35.9 |
| APOC4_AWFLESK              | 440.7 | 2 | 623.3  | 1 | y5  | 39.6 |
| APOD_IPTTFENGR             | 517.8 | 2 | 824.4  | 1 | y7  | 29.4 |
| APOE_AQAWGER               | 409.2 | 2 | 514.2  | 1 | b5  | 29.9 |
| APOF_SGVQQLIQYYQDQK        | 566.6 | 3 | 613.3  | 1 | b6  | 43.6 |
| APOH_ATVVYQGER             | 511.8 | 2 | 751.4  | 1 | y6  | 25.1 |
| APOL1_LNILNNNYK            | 553.3 | 2 | 765.4  | 1 | y6  | 35.0 |
| APOM_SLTSCCLDSK            | 505.7 | 2 | 810.4  | 1 | y7  | 28.9 |

|                      |       |   |        |   |     |      |
|----------------------|-------|---|--------|---|-----|------|
| APOM_AFLLTPR         | 409.3 | 2 | 599.4  | 1 | y5  | 37.3 |
| ATRN_CTWLIEGQPNR     | 687.3 | 2 | 813.4  | 1 | y7  | 37.3 |
| BAG6_EHIAASVSIPSEK   | 456.6 | 3 | 460.2  | 1 | y4  | 31.6 |
| BCDO2_VDIETLEK       | 473.8 | 2 | 732.4  | 1 | y6  | 32.8 |
| BGH3_DLLNNHILK       | 360.5 | 3 | 426.3  | 2 | y7  | 36.1 |
| BGH3_GDELADSALEIFK   | 704.4 | 2 | 993.5  | 1 | y9  | 48.5 |
| BTD_VDLITFDTPFAGR    | 726.4 | 2 | 1011.5 | 1 | y9  | 49.2 |
| BTD_ILSGDPYCEK       | 591.3 | 2 | 955.4  | 1 | y8  | 29.6 |
| BTD_LSSGLVTAALYGR    | 654.4 | 2 | 751.4  | 1 | y7  | 42.6 |
| C1QC_TNQVNSGGVLLR    | 629.3 | 2 | 815.5  | 1 | y8  | 31.4 |
| C1R_NIGEFCEGK        | 462.7 | 2 | 697.3  | 1 | y6  | 28.0 |
| C1R_YTTEIHK          | 434.2 | 2 | 704.4  | 1 | y6  | 29.3 |
| C1R_ESEQGVYTCTAQGIWK | 928.9 | 2 | 1227.6 | 1 | y10 | 38.2 |
| C1R_GYGFYTK          | 418.2 | 2 | 615.3  | 1 | y5  | 30.2 |
| C1RL_GSEAINAPGDNPAK  | 670.8 | 2 | 698.3  | 1 | y7  | 26.0 |
| C4BPA_DTIVFK         | 361.7 | 2 | 506.3  | 1 | y4  | 30.7 |
| C4BPA_TWYPEVPK       | 510.3 | 2 | 732.4  | 1 | y6  | 37.1 |
| C4BPB_ALLAFQESK      | 503.8 | 2 | 822.4  | 1 | y7  | 35.9 |
| CADH1_NTGVISVTTGLDR  | 716.4 | 2 | 1060.6 | 1 | y10 | 42.3 |
| CAH1_GGPFSDSYR       | 493.2 | 2 | 627.3  | 1 | y5  | 29.9 |
| CAH1_YSSLAEAAASK     | 513.8 | 2 | 776.4  | 1 | y8  | 26.3 |
| CAH1_VLDALQAIK       | 485.8 | 2 | 758.4  | 1 | y7  | 39.0 |
| CAH2_SADFTNFDPR      | 585.3 | 2 | 749.4  | 1 | y6  | 35.4 |
| CALR_FVLSSGK         | 369.2 | 2 | 491.3  | 1 | y5  | 27.9 |
| CATA_LFAYPDTHR       | 373.9 | 3 | 625.3  | 1 | y5  | 31.1 |
| CATA_DAQIFIQK        | 481.8 | 2 | 648.4  | 1 | y5  | 32.1 |
| CBPB2_YPLYVLK        | 448.3 | 2 | 732.5  | 1 | y6  | 38.9 |
| CBPB2_DTGTYGFLPER    | 684.8 | 2 | 831.5  | 1 | y7  | 43.6 |
| CETP_ASYPDITGEK      | 540.8 | 2 | 759.4  | 1 | y7  | 29.7 |
| CFAB_DISEVWTPR       | 508.3 | 2 | 787.4  | 1 | y7  | 32.1 |
| CFAB_STGSWSTLK       | 483.7 | 2 | 778.4  | 1 | y7  | 29.8 |
| CFAB_VASYGVKPR       | 488.8 | 2 | 806.5  | 1 | y7  | 23.3 |
| CFAB_VSEADSSNADWVTK  | 754.8 | 2 | 1007.5 | 1 | y9  | 30.4 |
| CFAB_QLNEINYEDHK     | 468.2 | 3 | 485.2  | 1 | b4  | 27.7 |
| CFAH_EGWIHTVCINGR    | 481.2 | 3 | 619.3  | 1 | y5  | 36.9 |
| CFAI_FSVSLK          | 340.7 | 2 | 533.3  | 1 | y5  | 33.1 |
| CFAI_VFSLQWGEVK      | 596.8 | 2 | 946.5  | 1 | y8  | 44.4 |
| CHLE_NIAAFGGNPK      | 494.8 | 2 | 761.4  | 1 | y8  | 29.6 |
| CHLE_TQILVGVNK       | 486.3 | 2 | 742.5  | 1 | y7  | 31.1 |

|                        |       |   |        |   |     |      |
|------------------------|-------|---|--------|---|-----|------|
| CHLE_IFFPGVSEFGK       | 614.3 | 2 | 967.5  | 1 | y9  | 47.1 |
| CHLE_AEEILSR           | 409.2 | 2 | 617.4  | 1 | y5  | 26.2 |
| CHLE_YLTLNTESTR        | 599.3 | 2 | 921.5  | 1 | y8  | 31.7 |
| CLUS_EIQNAVNGVK        | 536.3 | 2 | 829.5  | 1 | y8  | 26.5 |
| CLUS_TLLSNLEEAK        | 559.3 | 2 | 903.5  | 1 | y8  | 39.4 |
| CLUS_IDSLENDR          | 537.8 | 2 | 846.4  | 1 | y7  | 31.7 |
| CLUS_ASSIIDELFQDR      | 697.4 | 2 | 922.4  | 1 | y7  | 50.1 |
| CLUS_RPHFFFPK          | 359.2 | 3 | 411.7  | 2 | y6  | 33.6 |
| CLUS_EILSVDCSTNNPSQAK  | 881.9 | 2 | 1221.5 | 1 | y11 | 31.5 |
| CLUS_ELDESLQVAER       | 644.8 | 2 | 802.4  | 1 | y7  | 32.9 |
| CLUS_ALQEYR            | 390.2 | 2 | 595.3  | 1 | y4  | 23.5 |
| CNDP1_ALEQDLPVNIK      | 620.4 | 2 | 798.5  | 1 | y7  | 39.0 |
| CNDP1_AIHLDL EEYR      | 420.2 | 3 | 467.2  | 1 | y3  | 38.1 |
| CO2_HAFILQDTK          | 358.2 | 3 | 469.3  | 1 | b4  | 27.9 |
| CO3_VVLVAVDK           | 421.8 | 2 | 644.4  | 1 | y6  | 31.7 |
| CO3_NEQVEIR            | 444.2 | 2 | 644.4  | 1 | y5  | 24.6 |
| CO4A_DSSTWLTAFLVK      | 684.4 | 2 | 791.5  | 1 | y7  | 51.9 |
| CO5_GGSASTWLTAFLR      | 719.4 | 2 | 1078.6 | 1 | y9  | 50.7 |
| CO6_SEYGAALAWEK        | 612.8 | 2 | 845.5  | 1 | y8  | 37.3 |
| CO6_ENPAVIDFELAPIVDLVR | 670.7 | 3 | 811.5  | 1 | y7  | 53.8 |
| CO6_GFVVAGPSR          | 445.2 | 2 | 487.3  | 1 | y5  | 30.4 |
| CO6_QLEWGLER           | 515.8 | 2 | 789.4  | 1 | y6  | 38.0 |
| CO6_TLNICEVGTIR        | 425.9 | 3 | 446.3  | 1 | y4  | 38.9 |
| CO6A1_VAVVQYSGTGQQRPER | 592.3 | 3 | 703.8  | 2 | y12 | 27.6 |
| CO6A2_LFAVAPNQNLK      | 607.8 | 2 | 713.4  | 1 | y6  | 36.1 |
| CO7_LSGNVLSYTFQVK      | 728.4 | 2 | 985.5  | 1 | y8  | 44.6 |
| CO7_ELSHLP SLYDYSAYR   | 605.3 | 3 | 774.3  | 1 | y6  | 42.7 |
| CO7_VLFYVDSEK          | 550.3 | 2 | 887.4  | 1 | y7  | 37.3 |
| CO7_QNDFNSVEEK         | 605.3 | 2 | 705.3  | 1 | y6  | 26.0 |
| CO7_AASGTQNNVLR        | 565.8 | 2 | 901.5  | 1 | y8  | 23.9 |
| CO8B_YEFILK            | 406.7 | 2 | 520.3  | 1 | y4  | 38.6 |
| CO8B_SGFSFGFK          | 438.7 | 2 | 585.3  | 1 | y5  | 41.3 |
| CO8B_IPGIFELGISSQSDR   | 540.3 | 3 | 679.3  | 1 | y6  | 47.4 |
| CO9_VVEEELAR           | 516.3 | 2 | 833.4  | 1 | y7  | 26.9 |
| CO9_TEHYEEQIEAFK       | 508.6 | 3 | 607.3  | 1 | y5  | 34.0 |
| CO9_TSNFNAAISLK        | 583.3 | 2 | 716.4  | 1 | y7  | 36.0 |
| CO9_DVVLTTTFVDDIK      | 733.4 | 2 | 938.5  | 1 | y8  | 46.2 |
| CO9_AIEDYINEFSVR       | 728.4 | 2 | 751.4  | 1 | y6  | 45.9 |
| COF1_NIILEEGK          | 458.3 | 2 | 688.4  | 1 | y6  | 30.6 |



|                       |       |   |        |   |     |      |
|-----------------------|-------|---|--------|---|-----|------|
| COL11_VFIGINDLEK      | 574.3 | 2 | 901.5  | 1 | y8  | 42.0 |
| CPN2_LSNNAISGLPQGVFGK | 801.4 | 2 | 989.5  | 1 | y10 | 44.1 |
| CPN2_GQVVPALNEK       | 527.8 | 2 | 671.4  | 1 | y6  | 30.6 |
| CRP_ESDTSYVSLK        | 564.8 | 2 | 609.4  | 1 | y5  | 30.4 |
| CXCL7_NIQSLEVIGK      | 550.8 | 2 | 745.4  | 1 | y7  | 36.5 |
| CXCL7_GTHCNQVEVIATLK  | 523.9 | 3 | 773.5  | 1 | y7  | 34.2 |
| DOPO_TPEGLTLLFK       | 559.8 | 2 | 920.5  | 1 | y8  | 47.3 |
| DSG2_YKPTPIPIK        | 352.9 | 3 | 389.2  | 1 | b3  | 33.6 |
| ECM1_NLPATDPLQR       | 562.8 | 2 | 897.5  | 1 | y8  | 33.1 |
| ENPL_GVVDSDDLPLNVS    | 743.4 | 2 | 1115.6 | 1 | y10 | 39.1 |
| ENTP5_ALLFEVK         | 410.3 | 2 | 635.4  | 1 | y5  | 43.4 |
| ESYT1_GSNPHLQTFTFTR   | 502.6 | 3 | 575.8  | 2 | y9  | 35.7 |
| EXT2_ASVVVPEEK        | 479.3 | 2 | 502.3  | 1 | y4  | 27.2 |
| FA7_TLAFVR            | 353.7 | 2 | 492.3  | 1 | y4  | 32.7 |
| FA9_NCELDVTCNIK       | 455.9 | 3 | 635.3  | 1 | y5  | 33.2 |
| FA9_SALVLQYLR         | 531.8 | 2 | 692.4  | 1 | y5  | 43.8 |
| FA9_VPLVDR            | 349.7 | 2 | 502.3  | 1 | y4  | 27.3 |
| FABPL_AIGLPEELIQK     | 605.9 | 2 | 856.5  | 1 | y7  | 42.6 |
| FAS_WVESLK            | 381.2 | 2 | 502.2  | 1 | b4  | 30.7 |
| FBLN1_GYHLNEEGTR      | 392.5 | 3 | 462.2  | 1 | y4  | 24.4 |
| FCG3A_AVVFLEPQWYR     | 704.4 | 2 | 749.4  | 1 | y5  | 48.1 |
| FCGBP_GNPAVSYVR       | 481.8 | 2 | 694.4  | 1 | y6  | 27.9 |
| FCGBP_LASVSVSR        | 409.7 | 2 | 634.4  | 1 | y6  | 26.0 |
| FCN3_GEPGDPVNLLR      | 583.8 | 2 | 711.5  | 1 | y6  | 38.2 |
| FCN3_SWSSYR           | 393.2 | 2 | 611.2  | 1 | b5  | 25.1 |
| FETA_GYQELLEK         | 490.3 | 2 | 759.4  | 1 | y6  | 33.6 |
| FETUA_QYGFK           | 401.7 | 2 | 511.2  | 1 | y4  | 26.3 |
| FETUB_LVVLFPFK        | 456.8 | 2 | 700.4  | 1 | y6  | 44.6 |
| FHR1_TGESAEFVCK       | 564.3 | 2 | 840.4  | 1 | y7  | 27.1 |
| FHR2_ITCAEEGWSPTPK    | 738.3 | 2 | 772.4  | 1 | y7  | 32.2 |
| FHR2_TGDIVEFVCK       | 584.3 | 2 | 781.4  | 1 | y6  | 38.1 |
| FHR5_TGDAVEFQCK       | 577.8 | 2 | 711.3  | 1 | y5  | 27.5 |
| FIBA_VPPEWK           | 378.2 | 2 | 423.2  | 1 | b4  | 24.4 |
| FIBA_HPDEAAFFDTASTGK  | 531.9 | 3 | 621.3  | 1 | b6  | 34.2 |
| FIBA_GSESGIFTNTK      | 570.8 | 2 | 610.3  | 1 | y5  | 28.9 |
| FIBB_AHYGGFTVQNEANK   | 512.6 | 3 | 703.3  | 1 | y6  | 28.7 |
| FIBB_YQISVNIK         | 426.2 | 2 | 560.3  | 1 | y5  | 27.3 |
| FIBG_DNCCILDER        | 597.7 | 2 | 965.4  | 1 | y7  | 30.6 |
| FINC_WSRPQAPITGYR     | 477.9 | 3 | 496.3  | 1 | y4  | 33.1 |

|                         |       |   |        |   |     |      |
|-------------------------|-------|---|--------|---|-----|------|
| FINC_LGVRPSQGGEAPR      | 441.9 | 3 | 605.8  | 2 | y12 | 24.7 |
| FINC_SYTITGLQPGETDYK    | 772.4 | 2 | 1079.5 | 1 | y10 | 37.0 |
| FINC_IYLYTLNDNAR        | 678.4 | 2 | 966.5  | 1 | y8  | 39.0 |
| FINC_FLATTPNSLLVSWQPPR  | 643.0 | 3 | 770.4  | 1 | y6  | 50.2 |
| FINC_IGDQWTK            | 374.2 | 2 | 634.3  | 1 | y5  | 27.4 |
| FINC_HTSVQTTSSGSGPFTDVR | 622.0 | 3 | 734.4  | 1 | y6  | 30.3 |
| FINC_IGDQWTK            | 431.2 | 2 | 748.3  | 1 | y6  | 26.7 |
| FINC_GEWTCIAYSQLR       | 495.2 | 3 | 503.3  | 1 | y4  | 41.5 |
| FUCO_DGLIVPIFQER        | 643.9 | 2 | 888.5  | 1 | y7  | 48.0 |
| G3BP1_INIPPQR           | 419.3 | 2 | 724.4  | 1 | y6  | 28.7 |
| G6PI_VFEGNRPTNSIVFTK    | 570.3 | 3 | 731.9  | 2 | y13 | 34.7 |
| GBLP_LWNTLGVCK          | 545.8 | 2 | 791.4  | 1 | y7  | 37.1 |
| GELS_TGAQELLR           | 444.3 | 2 | 658.4  | 1 | y5  | 29.2 |
| GPV_TLPAAAFR            | 423.7 | 2 | 632.4  | 1 | y6  | 32.6 |
| GPV_YLGVTLSPR           | 503.3 | 2 | 729.4  | 1 | y7  | 37.1 |
| GSHB_LFVDGQEIAVVYFR     | 552.6 | 3 | 584.3  | 1 | y4  | 32.4 |
| HABP2_GQCLITQSPYYR      | 791.9 | 2 | 1011.5 | 1 | y8  | 36.9 |
| HBA_VGAHAGEYGAEALER     | 510.6 | 3 | 617.3  | 1 | y5  | 29.7 |
| HCDH_LVEVIK             | 350.7 | 2 | 488.3  | 1 | y4  | 29.9 |
| HEMO_GEFVWK             | 383.2 | 2 | 579.3  | 1 | y4  | 34.5 |
| HEMO_ELISER             | 373.7 | 2 | 391.2  | 1 | y3  | 25.1 |
| HEMO_QGHNSVFLIK         | 381.5 | 3 | 520.3  | 1 | y4  | 32.9 |
| HEP2_GPLDQLEK           | 450.2 | 2 | 632.3  | 1 | y5  | 32.6 |
| HEP2_GGETAQSADPQWEQLNKK | 987.0 | 2 | 1156.6 | 1 | y9  | 32.7 |
| HEP2_LNILNAK            | 393.2 | 2 | 558.4  | 1 | y5  | 32.5 |
| HEP2_FAFNLYR            | 465.7 | 2 | 712.4  | 1 | y5  | 42.0 |
| HEP2_YEITTIHNLFR        | 469.6 | 3 | 557.8  | 2 | y9  | 42.7 |
| HEP2_NFGYTLR            | 435.7 | 2 | 609.3  | 1 | y5  | 33.5 |
| HEP2_SVNDLYIQK          | 540.3 | 2 | 893.5  | 1 | y7  | 31.1 |
| HEP2_QFPILLDFK          | 560.8 | 2 | 845.5  | 1 | y7  | 51.0 |
| HEP2_TLEAQLTPR          | 514.8 | 2 | 814.4  | 1 | y7  | 31.6 |
| HEP2_EVLLPK             | 349.7 | 2 | 357.2  | 1 | y3  | 29.9 |
| HEP2_IAIDLK             | 410.3 | 2 | 706.4  | 1 | y6  | 43.4 |
| HEXA_TEIEDFPR           | 503.7 | 2 | 776.4  | 1 | y6  | 32.1 |
| HEXA_IQPDTIIQVWR        | 684.9 | 2 | 1127.6 | 1 | y9  | 46.0 |
| HGFA_LCNIEPDER          | 573.3 | 2 | 872.4  | 1 | y7  | 27.5 |
| HGFA_TTDVTQTGFIEK       | 670.3 | 2 | 923.5  | 1 | y8  | 35.3 |
| HGFA_VANYVDWINDR        | 682.8 | 2 | 818.4  | 1 | y6  | 41.8 |
| HPT_VGVVSGWGR           | 490.8 | 2 | 562.3  | 1 | y5  | 33.7 |

|                           |       |   |        |   |     |      |
|---------------------------|-------|---|--------|---|-----|------|
| HPT_VTSIQDWWQK            | 602.3 | 2 | 1003.5 | 1 | y8  | 37.2 |
| IBP3_ALAQCAPPPAVCAELVR    | 912.0 | 2 | 1208.6 | 1 | y11 | 39.2 |
| IBP3_FLNVLSPR             | 473.3 | 2 | 685.4  | 1 | y6  | 40.0 |
| IBP3_YGQPLPGYTTK          | 612.8 | 2 | 876.5  | 1 | y8  | 31.0 |
| ICAM1_VELAPLPSWQPVGK      | 760.9 | 2 | 1108.6 | 1 | y10 | 45.3 |
| IGF2_GIVEECCFR            | 585.3 | 2 | 900.3  | 1 | y6  | 32.6 |
| IGHM_YAATSQVLLPSK         | 639.4 | 2 | 1043.6 | 1 | y10 | 34.2 |
| IGHM_NVPLPVIAELPPK        | 693.9 | 2 | 1173.7 | 1 | y11 | 46.3 |
| IGHM_QIQVSWLR             | 515.3 | 2 | 561.3  | 1 | y4  | 40.8 |
| IGHM_QVGSVTTDQVQAEAK      | 809.4 | 2 | 1090.5 | 1 | y10 | 28.3 |
| IGJ_IVLVDNK               | 400.7 | 2 | 588.3  | 1 | y5  | 28.3 |
| IGJ_SSEDPNEDIVER          | 695.3 | 2 | 971.5  | 1 | y8  | 27.7 |
| IGJ_IIVPLNNR              | 469.8 | 2 | 613.3  | 1 | y5  | 33.4 |
| IL1AP_LYIEYGIQR           | 577.8 | 2 | 878.5  | 1 | y7  | 37.7 |
| IL1AP_NEVWWTIDGK          | 624.3 | 2 | 905.5  | 1 | y7  | 43.3 |
| IPSP_AWVEVDESCTR          | 581.3 | 2 | 892.4  | 1 | y8  | 26.7 |
| ITB1_IGFGSFVEK            | 492.3 | 2 | 870.4  | 1 | y8  | 40.1 |
| ITIH1_QAVDTAVDGVFIR       | 695.9 | 2 | 805.5  | 1 | y7  | 40.5 |
| ITIH1_FAHYVWTSQVNTANEAR   | 669.3 | 3 | 775.4  | 1 | y7  | 35.7 |
| ITIH1_EVAFDLEIPK          | 580.8 | 2 | 714.4  | 1 | y6  | 44.3 |
| ITIH1_AAISGENAGLVR        | 579.3 | 2 | 902.5  | 1 | y9  | 29.9 |
| ITIH1_LDAQASFLPK          | 545.3 | 2 | 861.5  | 1 | y8  | 37.1 |
| ITIH1_GSLVQASEANLQAAQDFVR | 668.7 | 3 | 806.4  | 1 | y7  | 47.0 |
| ITIH2_VVNNSPQPQNVVFDVQIPK | 708.0 | 3 | 945.5  | 1 | y8  | 44.5 |
| ITIH2_VQFELHYQEVK         | 473.9 | 3 | 596.8  | 2 | y9  | 36.1 |
| ITIH2_IYLQPGR             | 423.7 | 2 | 570.3  | 1 | y5  | 28.4 |
| ITIH2_AHVSFKPTVAQQR       | 490.3 | 3 | 630.9  | 2 | y11 | 26.6 |
| ITIH2_TILDDLRL            | 423.2 | 2 | 631.3  | 1 | y5  | 38.1 |
| ITIH2_IQPSGGTNINEALLR     | 791.9 | 2 | 1157.6 | 1 | y11 | 37.3 |
| ITIH2_FYNQVSTPLLR         | 669.4 | 2 | 686.4  | 1 | y6  | 40.0 |
| ITIH3_EVSFDVELPK          | 581.8 | 2 | 934.5  | 1 | y8  | 42.0 |
| K2C1_SLVNLGGSK            | 437.8 | 2 | 674.4  | 1 | y7  | 30.8 |
| KAIN_VGSALFLSHNLK         | 429.2 | 3 | 593.8  | 2 | y11 | 36.8 |
| KAIN_LGFTDLFSK            | 514.3 | 2 | 914.5  | 1 | y8  | 47.5 |
| KAIN_WADLSGITK            | 495.8 | 2 | 733.4  | 1 | y7  | 37.0 |
| KAIN_FFSAQTNR             | 485.7 | 2 | 676.3  | 1 | y6  | 27.4 |
| KLKB1_DSVTGTLPK           | 459.3 | 2 | 616.4  | 1 | y6  | 28.1 |
| KLKB1_VLTPDAFVCR          | 589.3 | 2 | 864.4  | 1 | y7  | 39.0 |
| KNG1_TVGSDFYSFK           | 626.3 | 2 | 1051.5 | 1 | y9  | 38.1 |

|                        |       |   |        |   |     |      |
|------------------------|-------|---|--------|---|-----|------|
| KNG1_AATGECTATV GK     | 583.3 | 2 | 922.4  | 1 | y9  | 22.4 |
| KNG1_DFVQPPTK          | 466.2 | 2 | 669.4  | 1 | y6  | 28.9 |
| LCAT_SSGLVSNAPGVQIR    | 692.9 | 2 | 941.5  | 1 | y9  | 34.8 |
| LCAT_STELCGLWQGR       | 653.8 | 2 | 876.4  | 1 | y7  | 39.4 |
| LDHA_ISGF PK           | 324.7 | 2 | 535.3  | 1 | y5  | 27.9 |
| LG3BP_VEIF YR          | 413.7 | 2 | 598.3  | 1 | y4  | 34.3 |
| LG3BP_SLGW LK          | 352.2 | 2 | 503.3  | 1 | y4  | 37.4 |
| LG3BP_SDLAVPSELALLK    | 678.4 | 2 | 870.5  | 1 | y8  | 47.2 |
| LG3BP_AVDTWSWGER       | 603.8 | 2 | 634.3  | 1 | y5  | 38.2 |
| LG3BP_SQLVYQSR         | 490.8 | 2 | 765.4  | 1 | y6  | 25.6 |
| LMNB1_EYEAALNSK        | 512.8 | 2 | 532.3  | 1 | y5  | 27.9 |
| LUM_NNQIDHIDEK         | 409.2 | 3 | 435.2  | 2 | y7  | 24.1 |
| LUM_SLEDLQLTHNK        | 433.2 | 3 | 549.3  | 2 | y9  | 31.2 |
| LUM_SLEYLDLSFNQIAR     | 834.9 | 2 | 1063.6 | 1 | y9  | 49.6 |
| LUM_LPSGLPVSLTL YLDNNK | 653.0 | 3 | 766.4  | 1 | y6  | 53.4 |
| MBL2_FQASVATPR         | 488.8 | 2 | 701.4  | 1 | y7  | 28.4 |
| MMSA_AISFVGSNK         | 461.8 | 2 | 738.4  | 1 | y7  | 26.4 |
| MUC18_GATLALTQVTPQDER  | 533.9 | 3 | 644.3  | 1 | y5  | 36.0 |
| MUC18_EVTVPVFYPT EK    | 704.9 | 2 | 980.5  | 1 | y8  | 42.1 |
| MVP_LAQDPFPLYPGEVLEK   | 606.0 | 3 | 771.4  | 1 | y7  | 49.1 |
| NHRF1_LGVQVR           | 336.2 | 2 | 558.3  | 1 | y5  | 26.5 |
| P5CS_DEILLANK          | 458.3 | 2 | 471.2  | 1 | b4  | 31.5 |
| PEDF_GQWVTK            | 359.7 | 2 | 471.2  | 1 | b4  | 24.4 |
| PERM_VVLEGGIDPILR      | 640.9 | 2 | 840.5  | 1 | y8  | 43.6 |
| PHLD_VAFLTVTLHQGGATR   | 524.3 | 3 | 570.8  | 2 | y11 | 39.7 |
| PHLD_IADVTSGLIGGEDGR   | 730.4 | 2 | 1061.5 | 1 | y11 | 37.0 |
| PLGA_DVVLFEK           | 425.2 | 2 | 635.4  | 1 | y5  | 36.1 |
| PLMN_VYLSECK           | 449.7 | 2 | 636.3  | 1 | y5  | 25.5 |
| PLMN_WELCDIPR          | 544.8 | 2 | 773.4  | 1 | y6  | 40.9 |
| PLMN_HSIFTPETNPR       | 433.6 | 3 | 487.3  | 1 | y4  | 29.8 |
| PLMN_LFLEPTR           | 438.3 | 2 | 615.3  | 1 | y5  | 35.3 |
| PLMN_LSSPAVITDK        | 515.8 | 2 | 830.5  | 1 | y8  | 30.6 |
| PLMN_EAQLPVIENK        | 570.8 | 2 | 699.4  | 1 | y6  | 33.2 |
| PLMN_YEFLNGR           | 449.7 | 2 | 606.3  | 1 | y5  | 33.1 |
| PLTP_TGLELSR           | 388.2 | 2 | 504.3  | 1 | y4  | 27.9 |
| PON1_EVQPVELPNCNLVK    | 819.9 | 2 | 1282.7 | 1 | y11 | 39.4 |
| PON1_SFNPNSPGK         | 474.2 | 2 | 599.3  | 1 | y6  | 23.8 |
| PON1_STVELFK           | 412.2 | 2 | 635.4  | 1 | y5  | 33.9 |
| PON1_IFFYDSENPPASEVLR  | 628.6 | 3 | 868.5  | 1 | y8  | 46.4 |

|                            |        |   |        |   |     |      |
|----------------------------|--------|---|--------|---|-----|------|
| PON1_IQNILTEEPK            | 592.8  | 2 | 943.5  | 1 | y8  | 34.6 |
| PRDX2_ATAWDGAFK            | 489.8  | 2 | 806.4  | 1 | y8  | 30.6 |
| PRDX2_TDEGIAYR             | 462.7  | 2 | 708.4  | 1 | y6  | 25.7 |
| PROC_ELNQAGQETLVGTGWGYHSSR | 745.0  | 3 | 874.9  | 2 | y16 | 38.9 |
| PROC_TFVLNFIK              | 491.3  | 2 | 733.5  | 1 | y6  | 47.5 |
| PROS_SFQTGLFTAAR           | 599.8  | 2 | 836.5  | 1 | y8  | 39.8 |
| PROS_FSAEFDJR              | 509.7  | 2 | 784.4  | 1 | y6  | 40.3 |
| PROS_NNLELSTPLK            | 564.8  | 2 | 787.5  | 1 | y7  | 35.8 |
| PROZ_ENFVLTTAK             | 511.8  | 2 | 533.3  | 1 | y5  | 33.1 |
| PSMD1_VSTAVLSITAK          | 545.3  | 2 | 731.5  | 1 | y7  | 35.7 |
| PVR_SVDIWLK                | 444.8  | 2 | 702.4  | 1 | y5  | 40.2 |
| QSOX1_SFYTAYLQR            | 574.8  | 2 | 751.4  | 1 | y6  | 39.4 |
| QSOX1_LAGAPSEDPQFPK        | 678.8  | 2 | 1044.5 | 1 | y9  | 33.5 |
| RET4_YWGVASFLQK            | 599.8  | 2 | 849.5  | 1 | y8  | 47.5 |
| RET4_LLNLDTGTCADSYFVFSR    | 689.0  | 3 | 742.4  | 1 | y6  | 50.0 |
| RET4_DPNGLPPEAQK           | 583.3  | 2 | 669.4  | 1 | y6  | 26.3 |
| S10AD_SLDVNQDSELK          | 624.3  | 2 | 833.4  | 1 | y7  | 30.0 |
| SAA4_GPGGVWAAK             | 421.7  | 2 | 688.4  | 1 | y7  | 28.1 |
| SAA4_FRPDGLPK              | 310.5  | 3 | 573.3  | 1 | b5  | 28.4 |
| SAE2_ESVLQFYPK             | 555.8  | 2 | 795.4  | 1 | y6  | 39.7 |
| SAMP_IVLGQEQDSYGGK         | 697.4  | 2 | 1068.5 | 1 | y10 | 30.4 |
| SEPP1_QPPAWSIR             | 477.8  | 2 | 729.4  | 1 | y6  | 33.6 |
| SEPP1_DDFLIYDR             | 528.8  | 2 | 566.3  | 1 | y4  | 39.5 |
| SEPP1_VSLATVDK             | 416.7  | 2 | 733.4  | 1 | y7  | 28.3 |
| SHBG_TSSSEFEVR             | 456.7  | 2 | 637.3  | 1 | y5  | 26.1 |
| SHBG_TWDPEGVIFYGDTNPK      | 613.6  | 3 | 941.4  | 1 | y8  | 46.7 |
| SHBG_QVSGPLTSK             | 458.8  | 2 | 689.4  | 1 | y7  | 24.9 |
| SHBG_IALGGLFPASNLR         | 721.4  | 2 | 804.4  | 1 | y7  | 51.4 |
| SHBG_QAEISASAPTSR          | 665.9  | 2 | 889.5  | 1 | y9  | 31.9 |
| SHBG_DIPQPHAEPWAFSLDLGLK   | 712.0  | 3 | 953.5  | 2 | y17 | 51.1 |
| SODE_AGLAASLAGPHSIVGR      | 492.9  | 3 | 618.3  | 2 | y13 | 37.2 |
| SPRC_YIPPCLDSELTEFPLR      | 650.7  | 3 | 837.4  | 2 | y14 | 50.2 |
| SSRP1_ELQCLTPR             | 508.8  | 2 | 646.3  | 1 | y5  | 29.6 |
| SYEP_LLSVNIR               | 407.8  | 2 | 588.3  | 1 | y5  | 35.2 |
| TFR1_VEYHFLSPYVSPK         | 522.6  | 3 | 690.4  | 1 | y6  | 40.1 |
| THBG_NALALFVLPK            | 543.3  | 2 | 787.5  | 1 | y7  | 49.7 |
| THBG_GWVDLFPK              | 530.8  | 2 | 817.5  | 1 | y7  | 50.1 |
| THRB_SEGSSVNLSPPLEQCVDR    | 1036.0 | 2 | 1210.6 | 1 | y10 | 38.8 |
| THRB_ELLESYIDGR            | 597.8  | 2 | 710.3  | 1 | y6  | 39.9 |

|                       |       |   |        |   |     |      |
|-----------------------|-------|---|--------|---|-----|------|
| THRB_SPQELLCGASLISDR  | 823.4 | 2 | 978.5  | 1 | y9  | 43.7 |
| THRB_ETWTANVGK        | 503.3 | 2 | 589.3  | 1 | y6  | 28.8 |
| TRFE_DGAGDVAFVK       | 489.7 | 2 | 735.4  | 1 | y7  | 31.4 |
| TRFE_EFQLFSSPHGK      | 426.2 | 3 | 612.3  | 1 | y6  | 36.7 |
| TRFE_SASDLTWDNLK      | 625.3 | 2 | 776.4  | 1 | y6  | 37.8 |
| TRFE_EGYYGYTGAFR      | 642.3 | 2 | 771.4  | 1 | y7  | 36.8 |
| TRFE_NPDPWAK          | 414.2 | 2 | 501.3  | 1 | y4  | 27.6 |
| TRFE_YLGEEYVK         | 500.8 | 2 | 724.4  | 1 | y6  | 33.4 |
| TSP1_SITLQVQEDR       | 604.3 | 2 | 793.4  | 1 | y6  | 39.8 |
| TSP1_DLASIAR          | 373.2 | 2 | 517.3  | 1 | y5  | 29.7 |
| TSP1_TIVTTLQDSIR      | 623.9 | 2 | 933.5  | 1 | y8  | 41.6 |
| TSP1_GTSQNDPNWVVR     | 686.8 | 2 | 770.4  | 1 | y6  | 31.9 |
| TTC37_DFNCWESLGEAYLSR | 616.3 | 3 | 738.4  | 1 | y6  | 46.8 |
| TTHY_VLDAVR           | 336.7 | 2 | 460.3  | 1 | y4  | 25.0 |
| TTHY_AADDTWEPFASGK    | 697.8 | 2 | 921.4  | 1 | y8  | 48.3 |
| UCHL3_YLENYDAIR       | 578.8 | 2 | 880.4  | 1 | y7  | 33.8 |
| VCAM1_NTVISVNPSTK     | 580.3 | 2 | 845.5  | 1 | y8  | 29.3 |
| VCAM1_LTAFPSSEVK      | 539.8 | 2 | 646.3  | 1 | y6  | 33.0 |
| VIGLN_INIPPPSVNR      | 553.8 | 2 | 766.4  | 1 | y7  | 32.2 |
| VIME_SSVPGVR          | 351.2 | 2 | 527.3  | 1 | y5  | 23.0 |
| VTDB_FPSGTFEQVSQLVK   | 522.9 | 3 | 574.4  | 1 | y5  | 45.8 |
| VTDB_VCSQYAAAYGEK     | 638.3 | 2 | 1016.5 | 1 | y9  | 26.8 |
| VTDB_LCDNLSTK         | 475.7 | 2 | 837.4  | 1 | y7  | 25.0 |
| VTDB_VLEPTLK          | 400.2 | 2 | 458.3  | 1 | y4  | 30.1 |
| VTNC_CTEGFNVDK        | 535.2 | 2 | 909.4  | 1 | y8  | 27.1 |
| VTNC_GQYCYELDEK       | 652.8 | 2 | 956.4  | 1 | y7  | 30.6 |
| VTNC_DVWGIEGPIDAAFTR  | 823.9 | 2 | 1076.5 | 1 | y10 | 50.9 |
| VTNC_GSQYWR           | 398.7 | 2 | 524.3  | 1 | y3  | 26.4 |
| VTNC_FEDGVLDPPDYPR    | 711.8 | 2 | 875.4  | 1 | y7  | 38.5 |
| VTNC_QPQFISR          | 438.2 | 2 | 522.3  | 1 | y4  | 27.8 |
| VTNC_VDTVDPYPR        | 579.8 | 2 | 629.3  | 1 | y5  | 31.2 |
| VWF_AVSPPLPYLR        | 508.3 | 2 | 548.3  | 1 | y4  | 40.0 |
| VWF_VTVFPIGIGDR       | 587.3 | 2 | 727.4  | 1 | y7  | 43.9 |
| ZA2G_SSGAFWK          | 391.7 | 2 | 608.3  | 1 | y5  | 31.1 |
| ZPI_LFDEINPETK        | 603.3 | 2 | 945.5  | 1 | y8  | 36.0 |

---

**Table S6. AFP, PIVKA and 17 protein value for multimarker panel development**

| Group | AFP   | PIVKA | CXCL7 | ANT3 | MUC18 | COF1 | CO4A | AMBP  | TSP1 | UCLH3 | LCAT | C1QC | CNDP1 | CO2  | CAH2 | CO6  | SAA4 | ZPI  | APOH  |
|-------|-------|-------|-------|------|-------|------|------|-------|------|-------|------|------|-------|------|------|------|------|------|-------|
| 1     | 17.6  | 40564 | 0.94  | 0.72 | 0.06  | 0.01 | 3.01 | 22.43 | 0.32 | 0.03  | 0.64 | 1.44 | 0.35  | 0.26 | 0.10 | 2.19 | 2.44 | 0.23 | 35.83 |
| 1     | 1.3   | 102   | 1.46  | 0.44 | 0.10  | 0.00 | 3.32 | 20.70 | 0.37 | 0.03  | 0.40 | 1.53 | 0.24  | 0.51 | 0.02 | 2.40 | 2.91 | 0.14 | 25.55 |
| 1     | 2     | 22    | 1.86  | 0.97 | 0.12  | 0.01 | 2.79 | 25.83 | 0.47 | 0.03  | 0.69 | 1.54 | 0.22  | 0.33 | 0.09 | 2.48 | 2.08 | 0.23 | 31.09 |
| 1     | 236.4 | 572   | 2.43  | 0.43 | 0.11  | 0.00 | 1.70 | 27.25 | 0.58 | 0.02  | 0.48 | 1.34 | 0.10  | 0.35 | 0.29 | 2.41 | 2.08 | 0.14 | 38.00 |
| 1     | 2.9   | 566   | 2.36  | 0.76 | 0.03  | 0.02 | 2.50 | 27.85 | 0.61 | 0.05  | 0.67 | 1.49 | 0.31  | 0.44 | 0.14 | 2.16 | 1.08 | 0.24 | 35.42 |
| 1     | 89.9  | 44    | 0.52  | 0.39 | 0.13  | 0.00 | 2.44 | 0.68  | 0.49 | 0.03  | 0.37 | 1.55 | 0.36  | 0.76 | 0.76 | 1.74 | 2.49 | 0.11 | 24.56 |
| 1     | 11.3  | 216   | 1.87  | 0.69 | 0.11  | 0.01 | 2.11 | 31.06 | 0.50 | 0.03  | 0.76 | 1.59 | 0.34  | 0.55 | 0.14 | 2.32 | 2.20 | 0.30 | 40.23 |
| 1     | 1.3   | 68    | 1.17  | 0.90 | 0.12  | 0.00 | 2.21 | 23.20 | 0.40 | 0.03  | 0.69 | 1.62 | 0.12  | 0.27 | 0.08 | 2.35 | 1.72 | 0.18 | 34.64 |
| 1     | 31.8  | 19    | 0.87  | 0.46 | 0.16  | 0.01 | 2.33 | 20.82 | 0.43 | 0.04  | 0.69 | 1.58 | 0.17  | 0.09 | 0.08 | 2.01 | 2.34 | 0.21 | 22.95 |
| 1     | 3.8   | 69    | 1.79  | 0.76 | 0.13  | 0.01 | 2.95 | 28.10 | 0.41 | 0.04  | 0.76 | 1.62 | 0.26  | 0.45 | 0.11 | 2.41 | 2.32 | 0.17 | 31.53 |
| 1     | 1.5   | 20    | 2.60  | 0.35 | 0.12  | 0.03 | 2.35 | 21.04 | 0.86 | 0.03  | 0.40 | 1.38 | 0.08  | 0.80 | 0.29 | 2.30 | 2.59 | 0.17 | 32.29 |
| 1     | 3.4   | 36    | 2.71  | 0.54 | 0.05  | 0.00 | 3.60 | 29.53 | 0.67 | 0.03  | 0.53 | 1.68 | 0.24  | 1.18 | 0.06 | 2.44 | 2.26 | 0.29 | 39.47 |
| 1     | 1.5   | 148   | 1.96  | 0.89 | 0.10  | 0.02 | 2.51 | 14.68 | 0.48 | 0.03  | 0.72 | 1.49 | 0.28  | 0.54 | 0.07 | 2.30 | 2.08 | 0.14 | 28.54 |
| 1     | 11.7  | 83    | 2.74  | 0.39 | 0.13  | 0.00 | 3.09 | 32.67 | 0.90 | 0.01  | 0.40 | 1.64 | 0.24  | 0.73 | 0.06 | 2.54 | 2.09 | 0.19 | 25.32 |
| 1     | 1.9   | 26    | 1.08  | 0.52 | 0.17  | 0.00 | 2.85 | 0.95  | 0.46 | 0.01  | 0.35 | 1.32 | 0.29  | 0.99 | 0.48 | 2.07 | 2.68 | 0.23 | 38.03 |
| 1     | 275.6 | 78    | 1.72  | 1.03 | 0.05  | 0.01 | 2.41 | 29.70 | 0.54 | 0.04  | 0.78 | 1.30 | 0.32  | 0.31 | 0.10 | 2.32 | 3.41 | 0.26 | 29.53 |
| 1     | 58.4  | 56    | 2.44  | 0.36 | 0.13  | 0.01 | 2.77 | 18.34 | 0.68 | 0.03  | 0.52 | 1.74 | 0.33  | 2.25 | 0.40 | 2.29 | 3.25 | 0.21 | 36.52 |
| 1     | 187.6 | 4833  | 2.13  | 0.28 | 0.11  | 0.00 | 3.25 | 30.40 | 0.80 | 0.03  | 0.35 | 1.62 | 0.21  | 0.77 | 0.11 | 2.23 | 2.34 | 0.22 | 45.87 |
| 1     | 37.7  | 26    | 1.51  | 0.84 | 0.12  | 0.00 | 1.92 | 26.00 | 0.41 | 0.04  | 0.75 | 1.61 | 0.35  | 0.45 | 0.07 | 2.53 | 1.98 | 0.21 | 39.54 |
| 1     | 533.4 | 307   | 2.41  | 0.71 | 0.08  | 0.01 | 2.54 | 25.15 | 0.69 | 0.03  | 0.45 | 1.62 | 0.39  | 1.12 | 0.21 | 2.42 | 1.53 | 0.23 | 40.72 |
| 1     | 3.6   | 552   | 1.10  | 0.39 | 0.11  | 0.01 | 2.96 | 1.20  | 0.61 | 0.03  | 0.47 | 1.23 | 0.22  | 1.22 | 0.78 | 2.32 | 2.50 | 0.24 | 26.41 |

|   |       |      |      |      |      |      |      |       |      |      |      |      |      |      |      |      |      |      |       |
|---|-------|------|------|------|------|------|------|-------|------|------|------|------|------|------|------|------|------|------|-------|
| 1 | 2.4   | 1890 | 1.87 | 0.26 | 0.16 | 0.00 | 1.96 | 17.12 | 0.58 | 0.01 | 0.35 | 1.72 | 0.16 | 0.73 | 0.05 | 2.21 | 3.32 | 0.17 | 34.22 |
| 1 | 2.7   | 241  | 2.85 | 0.35 | 0.06 | 0.00 | 2.09 | 30.08 | 0.70 | 0.02 | 0.48 | 1.52 | 0.18 | 1.16 | 0.08 | 2.53 | 1.33 | 0.14 | 28.80 |
| 1 | 32.4  | 68   | 2.39 | 0.37 | 0.16 | 0.00 | 3.29 | 29.49 | 0.69 | 0.02 | 0.45 | 1.70 | 0.06 | 0.85 | 0.04 | 2.47 | 2.55 | 0.29 | 41.91 |
| 1 | 70.2  | 21   | 1.87 | 0.97 | 0.07 | 0.02 | 2.69 | 24.94 | 0.51 | 0.04 | 0.63 | 1.71 | 0.27 | 0.32 | 0.09 | 2.37 | 1.69 | 0.22 | 35.95 |
| 1 | 2.8   | 39   | 1.82 | 0.75 | 0.07 | 0.01 | 2.75 | 28.83 | 0.48 | 0.04 | 0.75 | 1.52 | 0.33 | 0.41 | 0.08 | 2.48 | 1.90 | 0.29 | 39.91 |
| 1 | 37.8  | 32   | 2.70 | 0.42 | 0.16 | 0.01 | 3.23 | 27.56 | 0.70 | 0.04 | 0.33 | 2.03 | 0.14 | 1.30 | 0.13 | 2.39 | 1.97 | 0.21 | 41.15 |
| 1 | 72.6  | 2201 | 1.66 | 0.64 | 0.08 | 0.01 | 1.92 | 27.33 | 0.53 | 0.03 | 0.76 | 1.63 | 0.25 | 0.49 | 0.14 | 2.41 | 2.01 | 0.20 | 30.01 |
| 1 | 5     | 33   | 2.67 | 0.39 | 0.12 | 0.01 | 3.21 | 20.78 | 0.77 | 0.03 | 0.36 | 1.62 | 0.11 | 0.76 | 0.16 | 2.33 | 1.86 | 0.19 | 35.04 |
| 1 | 2.8   | 2087 | 1.95 | 0.40 | 0.12 | 0.01 | 1.96 | 21.14 | 0.54 | 0.01 | 0.36 | 1.50 | 0.23 | 1.10 | 0.09 | 2.22 | 2.81 | 0.20 | 29.94 |
| 1 | 68.3  | 221  | 1.41 | 0.77 | 0.09 | 0.01 | 2.18 | 28.35 | 0.28 | 0.02 | 0.71 | 1.38 | 0.17 | 0.42 | 0.16 | 2.82 | 2.10 | 0.23 | 28.06 |
| 1 | 11.3  | 27   | 2.06 | 0.56 | 0.11 | 0.01 | 2.23 | 29.42 | 0.59 | 0.02 | 0.29 | 1.92 | 0.10 | 1.00 | 0.15 | 2.26 | 2.95 | 0.20 | 33.05 |
| 1 | 1.8   | 30   | 2.77 | 0.53 | 0.11 | 0.00 | 2.80 | 27.24 | 0.85 | 0.01 | 0.44 | 1.55 | 0.34 | 0.89 | 0.10 | 2.66 | 2.09 | 0.17 | 40.10 |
| 1 | 2     | 35   | 2.93 | 0.26 | 0.09 | 0.00 | 1.89 | 24.86 | 0.75 | 0.02 | 0.50 | 1.78 | 0.36 | 0.22 | 0.11 | 2.20 | 2.93 | 0.24 | 37.58 |
| 1 | 1.6   | 922  | 1.32 | 0.73 | 0.07 | 0.01 | 1.49 | 29.91 | 0.38 | 0.03 | 0.76 | 1.59 | 0.23 | 0.53 | 0.07 | 2.69 | 2.55 | 0.21 | 29.98 |
| 1 | 43.5  | 29   | 1.28 | 1.05 | 0.09 | 0.01 | 1.64 | 34.14 | 0.36 | 0.04 | 0.75 | 1.53 | 0.19 | 0.68 | 0.08 | 2.57 | 3.30 | 0.21 | 28.37 |
| 1 | 1.8   | 20   | 1.97 | 0.42 | 0.08 | 0.00 | 2.42 | 28.85 | 0.46 | 0.03 | 0.49 | 1.22 | 0.24 | 1.00 | 0.08 | 2.32 | 2.54 | 0.20 | 41.19 |
| 1 | 682.3 | 43   | 2.40 | 0.27 | 0.23 | 0.00 | 1.66 | 14.94 | 0.76 | 0.02 | 0.30 | 1.80 | 0.08 | 1.36 | 0.03 | 2.06 | 1.59 | 0.12 | 30.22 |
| 1 | 1.2   | 62   | 2.80 | 0.40 | 0.08 | 0.00 | 2.30 | 27.51 | 0.58 | 0.02 | 0.46 | 1.40 | 0.29 | 0.95 | 0.13 | 2.42 | 2.17 | 0.15 | 36.38 |
| 1 | 10.6  | 136  | 2.80 | 0.44 | 0.07 | 0.00 | 3.04 | 24.13 | 0.74 | 0.01 | 0.50 | 1.35 | 0.33 | 0.84 | 0.07 | 2.39 | 3.11 | 0.22 | 41.53 |
| 1 | 2.9   | 27   | 1.58 | 0.72 | 0.09 | 0.02 | 3.35 | 9.98  | 0.35 | 0.03 | 0.59 | 1.52 | 0.20 | 0.28 | 0.11 | 2.20 | 7.57 | 0.16 | 23.84 |
| 1 | 5.8   | 19   | 1.69 | 0.48 | 0.10 | 0.01 | 2.07 | 27.46 | 0.41 | 0.02 | 0.71 | 1.56 | 0.21 | 0.19 | 0.12 | 2.30 | 2.43 | 0.20 | 32.28 |
| 1 | 3.3   | 412  | 1.18 | 0.53 | 0.07 | 0.01 | 2.31 | 22.86 | 0.28 | 0.02 | 0.64 | 1.52 | 0.27 | 0.34 | 0.08 | 2.31 | 2.12 | 0.19 | 26.08 |
| 1 | 1.9   | 24   | 0.26 | 0.79 | 0.07 | 0.00 | 2.22 | 22.66 | 0.27 | 0.03 | 0.64 | 1.49 | 0.10 | 0.13 | 0.09 | 2.17 | 2.59 | 0.20 | 25.60 |



|   |         |      |      |      |      |      |      |       |      |      |      |      |      |      |      |      |      |      |       |
|---|---------|------|------|------|------|------|------|-------|------|------|------|------|------|------|------|------|------|------|-------|
| 1 | 1.3     | 24   | 0.72 | 0.63 | 0.05 | 0.01 | 2.69 | 27.13 | 0.28 | 0.04 | 0.72 | 1.56 | 0.14 | 0.40 | 0.13 | 2.41 | 3.10 | 0.21 | 28.76 |
| 1 | 7.9     | 193  | 1.63 | 0.79 | 0.09 | 0.01 | 1.85 | 24.25 | 0.36 | 0.02 | 0.72 | 1.79 | 0.20 | 0.38 | 0.09 | 2.14 | 3.28 | 0.17 | 37.68 |
| 1 | 391     | 32   | 1.40 | 0.89 | 0.09 | 0.01 | 2.59 | 23.29 | 0.44 | 0.03 | 0.64 | 1.38 | 0.20 | 0.23 | 0.08 | 2.08 | 1.81 | 0.19 | 30.96 |
| 1 | 8.6     | 14   | 2.46 | 0.38 | 0.08 | 0.00 | 3.34 | 21.79 | 0.53 | 0.02 | 0.45 | 1.50 | 0.29 | 1.03 | 0.03 | 2.28 | 2.78 | 0.18 | 30.69 |
| 1 | 21.6    | 184  | 2.38 | 0.32 | 0.04 | 0.00 | 2.40 | 29.32 | 0.64 | 0.02 | 0.45 | 1.01 | 0.24 | 2.01 | 0.10 | 2.42 | 2.28 | 0.26 | 33.81 |
| 1 | 2.2     | 389  | 2.64 | 0.31 | 0.10 | 0.01 | 2.72 | 17.51 | 0.61 | 0.01 | 0.27 | 1.54 | 0.06 | 1.03 | 0.25 | 2.26 | 2.20 | 0.22 | 39.26 |
| 1 | 568.5   | 184  | 0.28 | 0.67 | 0.09 | 0.02 | 1.45 | 0.66  | 0.35 | 0.02 | 0.31 | 1.21 | 0.30 | 0.87 | 0.55 | 1.63 | 1.53 | 0.19 | 33.07 |
| 1 | 62886.4 | 1137 | 0.69 | 0.24 | 0.09 | 0.00 | 2.99 | 0.68  | 0.62 | 0.02 | 0.32 | 1.39 | 0.20 | 0.75 | 0.38 | 1.86 | 2.74 | 0.13 | 23.81 |
| 1 | 1.2     | 19   | 2.21 | 0.25 | 0.10 | 0.00 | 2.76 | 27.01 | 0.67 | 0.02 | 0.37 | 1.66 | 0.27 | 0.72 | 0.05 | 2.25 | 2.26 | 0.17 | 31.56 |
| 0 | 5.3     | 21   | 1.62 | 0.31 | 0.19 | 0.00 | 2.36 | 17.54 | 0.47 | 0.00 | 0.22 | 1.38 | 0.11 | 0.19 | 0.09 | 1.88 | 1.40 | 0.08 | 19.43 |
| 0 | 1.6     | 27   | 2.36 | 0.24 | 0.17 | 0.00 | 2.11 | 13.94 | 0.42 | 0.01 | 0.21 | 1.03 | 0.06 | 0.16 | 0.06 | 1.93 | 1.93 | 0.09 | 18.99 |
| 0 | 5.6     | 17   | 1.61 | 0.13 | 0.16 | 0.00 | 1.94 | 12.43 | 0.46 | 0.00 | 0.25 | 1.32 | 0.17 | 0.16 | 0.04 | 1.78 | 2.12 | 0.13 | 19.31 |
| 0 | 2.6     | 7    | 1.71 | 0.11 | 0.31 | 0.00 | 1.95 | 11.70 | 0.40 | 0.00 | 0.23 | 1.85 | 0.10 | 0.07 | 0.05 | 1.80 | 1.26 | 0.09 | 13.62 |
| 0 | 2.6     | 15   | 2.06 | 0.18 | 0.19 | 0.00 | 1.51 | 17.26 | 0.42 | 0.02 | 0.18 | 1.36 | 0.13 | 0.09 | 0.05 | 1.89 | 1.57 | 0.11 | 21.05 |
| 0 | 1.1     | 11   | 1.48 | 0.22 | 0.27 | 0.00 | 1.63 | 15.37 | 0.30 | 0.00 | 0.24 | 1.43 | 0.13 | 0.07 | 0.04 | 1.68 | 5.55 | 0.09 | 21.81 |
| 0 | 0.8     | 16   | 1.61 | 0.17 | 0.15 | 0.00 | 2.57 | 19.79 | 0.39 | 0.00 | 0.27 | 1.31 | 0.09 | 0.21 | 0.06 | 2.00 | 1.86 | 0.13 | 19.14 |
| 0 | 2.9     | 17   | 1.89 | 0.23 | 0.15 | 0.00 | 1.23 | 15.78 | 0.43 | 0.02 | 0.30 | 1.51 | 0.19 | 0.04 | 0.03 | 1.79 | 1.96 | 0.13 | 24.01 |
| 0 | 1.6     | 11   | 1.73 | 0.23 | 0.18 | 0.00 | 2.31 | 18.47 | 0.31 | 0.01 | 0.26 | 1.46 | 0.14 | 0.13 | 0.04 | 1.90 | 1.31 | 0.14 | 23.30 |
| 0 | 63.8    | 79   | 1.28 | 0.17 | 0.22 | 0.00 | 1.16 | 9.08  | 0.28 | 0.00 | 0.13 | 2.16 | 0.08 | 0.05 | 0.03 | 1.32 | 2.15 | 0.10 | 8.96  |
| 0 | 1.3     | 15   | 1.69 | 0.16 | 0.17 | 0.00 | 2.18 | 15.44 | 0.37 | 0.00 | 0.20 | 1.01 | 0.12 | 0.16 | 0.03 | 1.75 | 1.55 | 0.06 | 18.63 |
| 0 | 1.3     | 26   | 1.72 | 0.22 | 0.20 | 0.00 | 2.32 | 14.97 | 0.41 | 0.00 | 0.26 | 1.30 | 0.11 | 0.02 | 0.03 | 1.71 | 1.72 | 0.09 | 15.90 |
| 0 | 1.8     | 15   | 1.78 | 0.19 | 0.13 | 0.00 | 2.24 | 17.21 | 0.35 | 0.01 | 0.34 | 1.31 | 0.20 | 0.14 | 0.07 | 1.78 | 2.65 | 0.13 | 9.33  |
| 0 | 1.8     | 12   | 1.50 | 0.20 | 0.14 | 0.00 | 1.80 | 15.94 | 0.36 | 0.02 | 0.26 | 1.26 | 0.06 | 0.07 | 0.03 | 1.79 | 1.42 | 0.10 | 18.89 |

|   |      |    |      |      |      |      |      |       |      |      |      |      |      |      |      |      |      |      |       |
|---|------|----|------|------|------|------|------|-------|------|------|------|------|------|------|------|------|------|------|-------|
| 0 | 1    | 16 | 1.54 | 0.23 | 0.28 | 0.00 | 2.27 | 15.73 | 0.38 | 0.01 | 0.23 | 1.39 | 0.13 | 0.28 | 0.03 | 1.84 | 2.68 | 0.07 | 16.44 |
| 0 | 0.7  | 38 | 1.22 | 0.29 | 0.25 | 0.00 | 2.64 | 15.45 | 0.32 | 0.01 | 0.19 | 1.61 | 0.15 | 0.03 | 0.02 | 1.69 | 3.18 | 0.08 | 17.33 |
| 0 | 1.9  | 17 | 1.91 | 0.16 | 0.22 | 0.00 | 2.19 | 16.44 | 0.34 | 0.01 | 0.36 | 1.35 | 0.21 | 0.18 | 0.03 | 2.18 | 1.70 | 0.15 | 25.07 |
| 0 | 2.2  | 7  | 1.46 | 0.12 | 0.24 | 0.00 | 1.41 | 10.43 | 0.39 | 0.02 | 0.13 | 1.56 | 0.08 | 0.15 | 0.02 | 1.70 | 1.09 | 0.08 | 13.74 |
| 0 | 6.5  | 29 | 1.35 | 0.14 | 0.19 | 0.00 | 1.94 | 12.61 | 0.34 | 0.01 | 0.18 | 1.72 | 0.07 | 0.22 | 0.04 | 1.55 | 1.69 | 0.08 | 7.38  |
| 0 | 3.5  | 21 | 1.59 | 0.18 | 0.21 | 0.00 | 0.24 | 15.10 | 0.47 | 0.01 | 0.33 | 1.42 | 0.15 | 0.15 | 0.05 | 1.83 | 2.26 | 0.09 | 21.50 |
| 0 | 1.9  | 24 | 1.56 | 0.24 | 0.19 | 0.00 | 1.16 | 15.17 | 0.31 | 0.01 | 0.30 | 1.53 | 0.19 | 0.14 | 0.07 | 1.77 | 2.29 | 0.08 | 18.13 |
| 0 | 10.4 | 19 | 1.32 | 0.26 | 0.22 | 0.00 | 1.50 | 14.00 | 0.38 | 0.01 | 0.24 | 1.62 | 0.07 | 0.09 | 0.06 | 1.76 | 2.99 | 0.12 | 20.53 |
| 0 | 1.6  | 14 | 1.77 | 0.23 | 0.21 | 0.00 | 2.44 | 19.54 | 0.39 | 0.00 | 0.33 | 1.50 | 0.25 | 0.24 | 0.08 | 1.79 | 2.23 | 0.16 | 24.56 |
| 0 | 1.2  | 19 | 1.09 | 0.32 | 0.19 | 0.00 | 1.99 | 17.98 | 0.22 | 0.01 | 0.24 | 1.43 | 0.06 | 0.07 | 0.03 | 1.86 | 2.22 | 0.10 | 25.70 |
| 0 | 1.9  | 20 | 1.13 | 0.37 | 0.20 | 0.00 | 2.05 | 14.85 | 0.33 | 0.01 | 0.23 | 1.59 | 0.10 | 0.14 | 0.03 | 2.20 | 1.55 | 0.12 | 13.57 |
| 0 | 30.5 | 23 | 1.86 | 0.20 | 0.19 | 0.00 | 1.77 | 12.90 | 0.35 | 0.01 | 0.18 | 1.49 | 0.13 | 0.13 | 0.05 | 1.31 | 1.96 | 0.14 | 16.88 |
| 0 | 2.2  | 13 | 0.45 | 0.22 | 0.18 | 0.00 | 1.60 | 0.53  | 0.15 | 0.01 | 0.18 | 1.55 | 0.08 | 0.18 | 0.10 | 1.52 | 1.23 | 0.06 | 17.01 |
| 0 | 1.8  | 16 | 1.54 | 0.17 | 0.16 | 0.00 | 1.97 | 14.47 | 0.21 | 0.00 | 0.20 | 1.31 | 0.11 | 0.09 | 0.02 | 2.09 | 2.32 | 0.12 | 17.03 |
| 0 | 14.2 | 19 | 0.85 | 0.10 | 0.17 | 0.00 | 1.94 | 1.13  | 0.42 | 0.01 | 0.25 | 1.01 | 0.19 | 0.02 | 0.05 | 1.68 | 2.09 | 0.11 | 13.84 |
| 0 | 2.3  | 18 | 1.28 | 0.21 | 0.21 | 0.00 | 2.32 | 16.77 | 0.32 | 0.00 | 0.23 | 1.39 | 0.04 | 0.13 | 0.05 | 1.90 | 1.60 | 0.09 | 22.51 |
| 0 | 1.8  | 14 | 1.75 | 0.17 | 0.16 | 0.00 | 2.64 | 11.47 | 0.40 | 0.00 | 0.26 | 1.27 | 0.16 | 0.33 | 0.07 | 1.68 | 2.06 | 0.10 | 14.73 |
| 0 | 7.4  | 16 | 1.43 | 0.21 | 0.17 | 0.00 | 2.22 | 8.61  | 0.35 | 0.00 | 0.20 | 1.31 | 0.10 | 0.21 | 0.06 | 1.59 | 1.45 | 0.10 | 9.04  |
| 0 | 4.4  | 17 | 1.83 | 0.18 | 0.20 | 0.00 | 1.82 | 10.41 | 0.45 | 0.00 | 0.21 | 1.16 | 0.11 | 0.04 | 0.08 | 1.62 | 1.52 | 0.12 | 16.61 |
| 0 | 1.7  | 18 | 1.89 | 0.19 | 0.16 | 0.00 | 1.76 | 16.42 | 0.36 | 0.01 | 0.24 | 1.21 | 0.06 | 0.19 | 0.02 | 1.98 | 1.22 | 0.11 | 17.02 |
| 0 | 1.8  | 19 | 0.50 | 0.13 | 0.19 | 0.00 | 0.80 | 0.58  | 0.29 | 0.02 | 0.14 | 1.45 | 0.05 | 0.17 | 0.05 | 1.52 | 1.22 | 0.06 | 14.66 |
| 0 | 3.6  | 12 | 1.38 | 0.15 | 0.22 | 0.00 | 2.45 | 8.26  | 0.27 | 0.00 | 0.21 | 1.52 | 0.14 | 0.40 | 0.11 | 1.38 | 1.42 | 0.05 | 15.63 |
| 0 | 7.1  | 14 | 1.41 | 0.12 | 0.22 | 0.00 | 1.89 | 16.14 | 0.43 | 0.01 | 0.26 | 1.47 | 0.10 | 0.03 | 0.02 | 1.56 | 1.42 | 0.08 | 16.72 |

|   |     |    |      |      |      |      |      |       |      |      |      |      |      |      |      |      |      |      |       |
|---|-----|----|------|------|------|------|------|-------|------|------|------|------|------|------|------|------|------|------|-------|
| 0 | 2.7 | 13 | 1.84 | 0.22 | 0.19 | 0.00 | 1.10 | 19.53 | 0.40 | 0.01 | 0.35 | 1.34 | 0.26 | 0.13 | 0.05 | 1.93 | 2.75 | 0.12 | 18.05 |
| 0 | 5.9 | 17 | 2.21 | 0.17 | 0.19 | 0.00 | 2.24 | 15.16 | 0.44 | 0.01 | 0.19 | 1.41 | 0.07 | 0.04 | 0.07 | 1.74 | 2.80 | 0.08 | 15.16 |
| 0 | 2.4 | 13 | 1.21 | 0.23 | 0.21 | 0.00 | 2.45 | 11.80 | 0.34 | 0.00 | 0.28 | 1.75 | 0.06 | 0.13 | 0.04 | 1.48 | 2.00 | 0.07 | 14.59 |
| 0 | 2.7 | 15 | 1.76 | 0.11 | 0.23 | 0.00 | 2.39 | 14.33 | 0.45 | 0.01 | 0.19 | 1.47 | 0.05 | 0.13 | 0.04 | 1.71 | 2.20 | 0.11 | 20.94 |
| 0 | 5.8 | 89 | 1.99 | 0.11 | 0.32 | 0.00 | 2.07 | 8.87  | 0.54 | 0.00 | 0.05 | 1.88 | 0.11 | 0.44 | 0.10 | 0.67 | 0.89 | 0.05 | 10.56 |
| 0 | 3.2 | 24 | 1.30 | 0.23 | 0.16 | 0.00 | 1.37 | 11.38 | 0.31 | 0.00 | 0.18 | 0.67 | 0.10 | 0.08 | 0.03 | 1.77 | 2.06 | 0.12 | 13.10 |
| 0 | 1.5 | 18 | 1.60 | 0.21 | 0.19 | 0.00 | 2.04 | 16.86 | 0.34 | 0.00 | 0.27 | 1.38 | 0.13 | 0.05 | 0.05 | 2.04 | 1.90 | 0.09 | 15.13 |
| 0 | 5.4 | 17 | 1.52 | 0.21 | 0.21 | 0.00 | 2.15 | 14.15 | 0.34 | 0.01 | 0.26 | 1.80 | 0.14 | 0.23 | 0.08 | 1.66 | 0.72 | 0.10 | 18.03 |
| 0 | 1.2 | 22 | 1.40 | 0.21 | 0.13 | 0.00 | 2.56 | 17.24 | 0.38 | 0.00 | 0.21 | 1.64 | 0.05 | 0.24 | 0.07 | 2.16 | 2.50 | 0.15 | 20.63 |
| 0 | 2.4 | 11 | 1.12 | 0.14 | 0.19 | 0.00 | 1.88 | 13.48 | 0.25 | 0.00 | 0.20 | 0.94 | 0.06 | 0.11 | 0.02 | 1.63 | 1.74 | 0.07 | 13.63 |
| 0 | 4.3 | 24 | 1.90 | 0.13 | 0.21 | 0.00 | 2.08 | 11.26 | 0.32 | 0.01 | 0.18 | 1.33 | 0.12 | 0.13 | 0.08 | 1.56 | 0.60 | 0.11 | 14.73 |
| 0 | 8.3 | 10 | 1.56 | 0.18 | 0.22 | 0.00 | 2.21 | 16.02 | 0.36 | 0.00 | 0.24 | 1.47 | 0.18 | 0.03 | 0.03 | 1.79 | 1.39 | 0.12 | 23.14 |
| 0 | 9.5 | 11 | 1.80 | 0.22 | 0.18 | 0.00 | 1.90 | 11.44 | 0.44 | 0.00 | 0.29 | 1.38 | 0.04 | 0.32 | 0.03 | 1.66 | 2.50 | 0.13 | 14.42 |
